# Supplementary material for: Magnetic, luminescence, topological and theoretical studies of structurally diverse supramolecular lanthanide coordination polymers with flexible glutaric acid as a linker
Source: Royal Society of Chemistry journal article supplement (doi:10.1039/c9nj03664d), 2019-01-01
Supplement: c9nj03664d1.pdf [file c9nj03664d1.pdf]

**Magnetic, Luminescent, Topological and Theoretical Studies of Structurally Diverse  
Supramolecular Lanthanide Coordination Polymers with Flexible Glutaric Acid as Linker**

Manesh Kumar,<sup>a</sup> Cheng-Qiang Qiu,<sup>b</sup> Jan K. Zaręba,<sup>c</sup> Antonio Frontera,<sup>d</sup> Amanpreet Kaur Jassal,<sup>e</sup>  
Subash Chandra Sahoo,<sup>f</sup> Sui-Jun Liu<sup>\*,b</sup> and Haq Nawaz Sheikh<sup>\*,a</sup>

<sup>a</sup>Department of Chemistry, University of Jammu, Baba Sahib Ambedkar Road, Jammu-180006, India. [hnsheikh@rediffmail.com](mailto:hnsheikh@rediffmail.com)

<sup>b</sup>School of Chemistry and Chemical Engineering, Jiangxi University of Science and Technology, Ganzhou 341000, Jiangxi Province, P. R. China. E-mail: [sjliu@jxust.edu.cn](mailto:sjliu@jxust.edu.cn)

<sup>c</sup>Advanced Materials Engineering and Modelling Group, Wrocław University of Science and Technology, Wyb. Wyspiańskiego 27, 50370, Wrocław, Poland.

<sup>d</sup>Departament de Química, Universitat de les Illes Balears, Crta de Valldemossa km 7.5, 07122 Palma de Mallorca (Balears), Spain.

<sup>e</sup>Schulich Faculty of Chemistry, Technion-Israel Institute of Technology, Technion Haifa-3200008, Israel.

<sup>f</sup>Department of Chemistry & Centre of Advanced Studies in Chemistry, Panjab University, Chandigarh-160014, India.

## Table of Contents

| <b>CONTENTS</b>                                                          | <b>Page Number</b> |
|--------------------------------------------------------------------------|--------------------|
| <b>1. X-Ray Crystal structures of CPs 1-8 .....</b>                      | <b>S3-S14</b>      |
| <b>2. Characterization by FTIR, TGA, PXRD and SQUID analysis.. .....</b> | <b>S15-S25</b>     |
| <b>3. Synthesis and Crystallographic Information (Tables).....</b>       | <b>S26-S48</b>     |
| <b>4. Continuous shape measures analysis (Table).....</b>                | <b>S49</b>         |

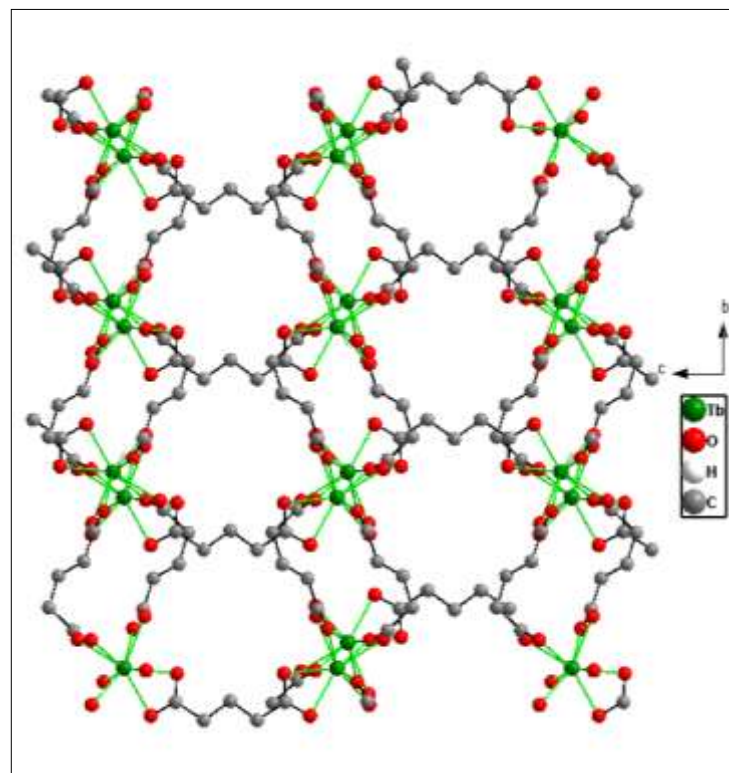

**Figure S1.** Packing of CP 1 along *a*-axis.

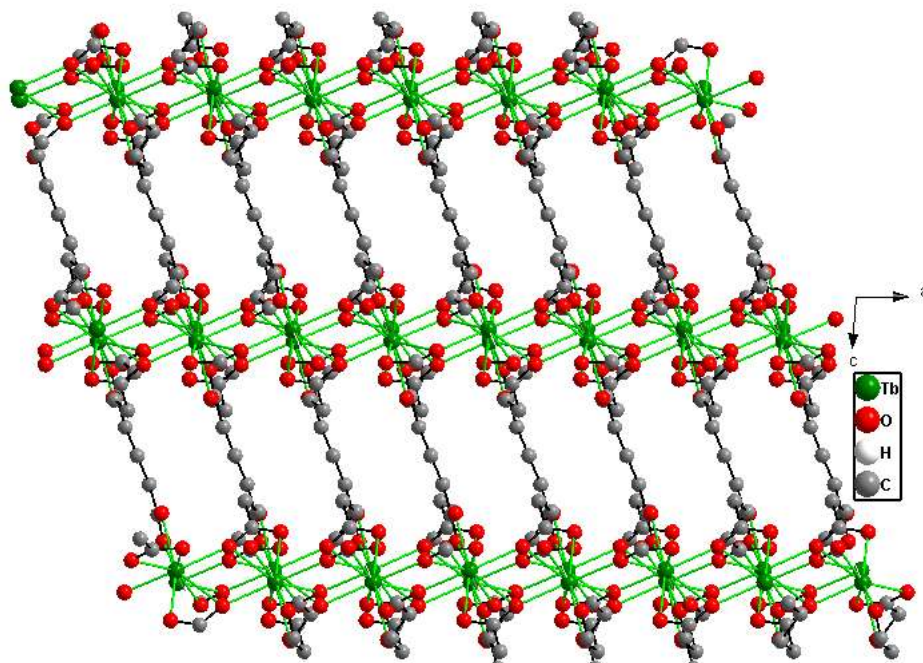

**Figure S2.** Packing of CP 1 along *b*-axis.

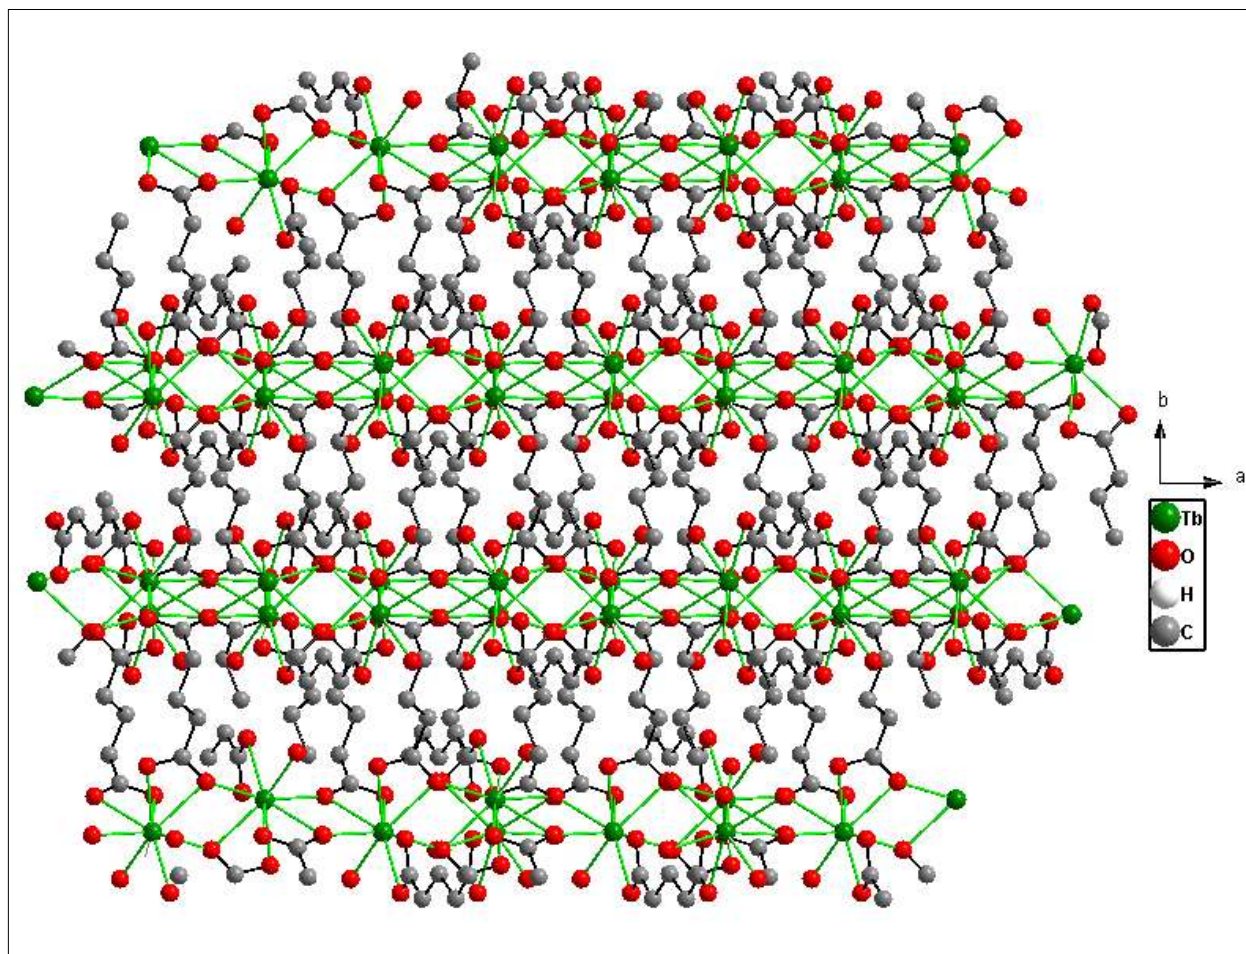

**Figure S3.** Packing of CP 1 along *c*-axis.

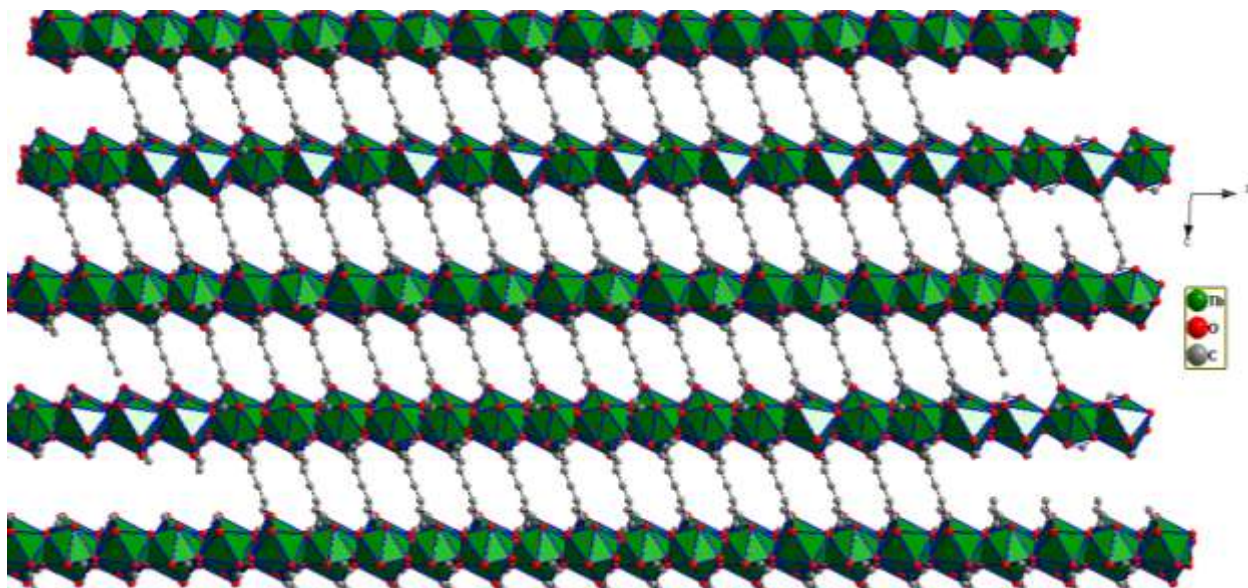

**FigureS4.** Polyhedral packing of CP 1 along *c*-axis.

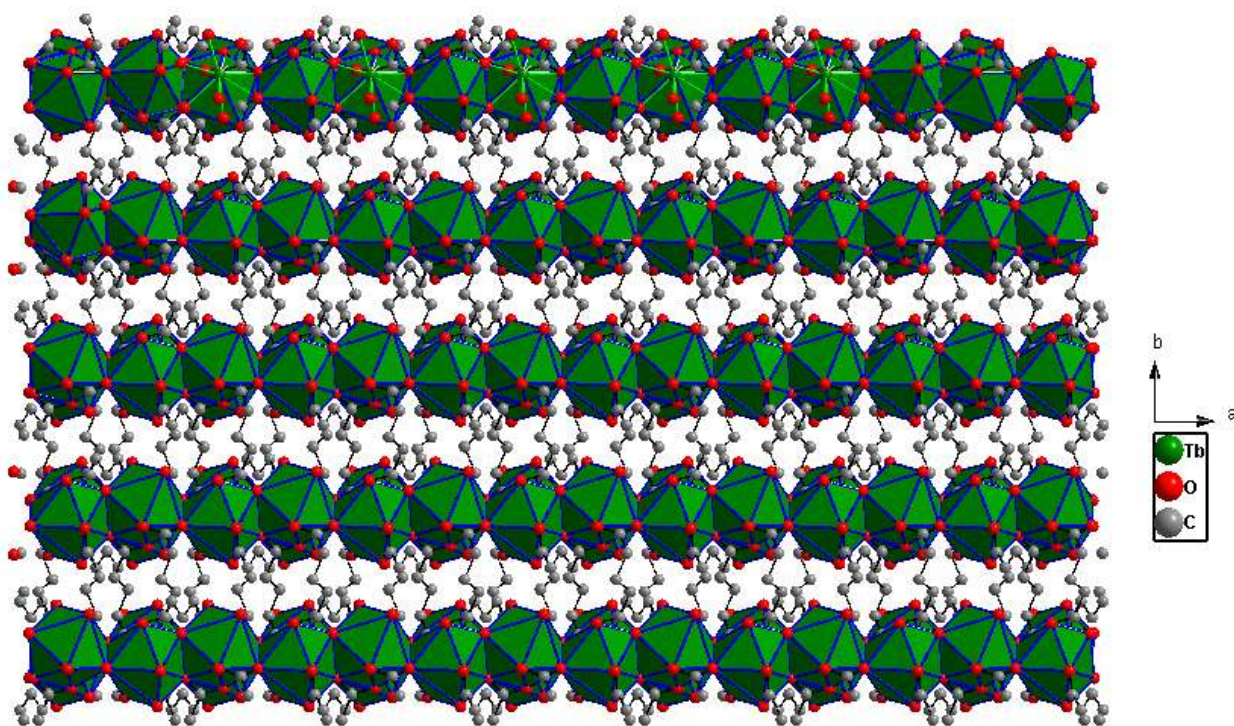

**Figure S5.** Polyhedral packing of CP 1 along *c*-axis.

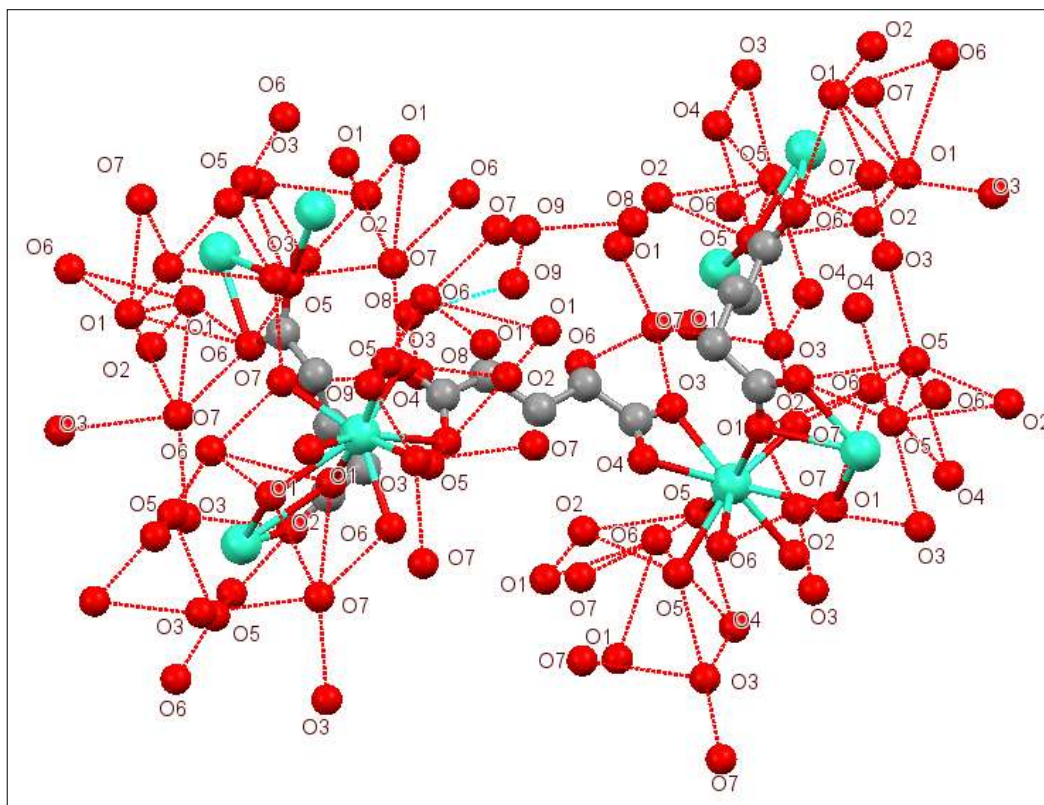

**Figure S6.** Hydrogen bonding geometries of CP 1.

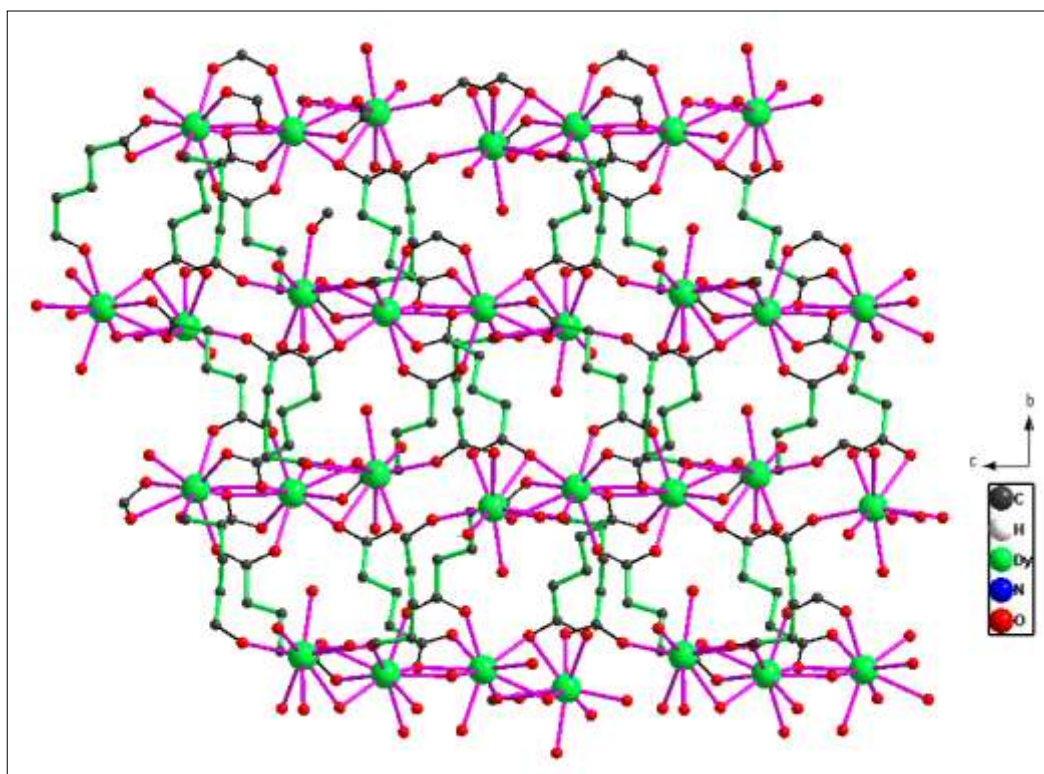

**Figure S7.** Packing of CP 5 along *a*-axis.

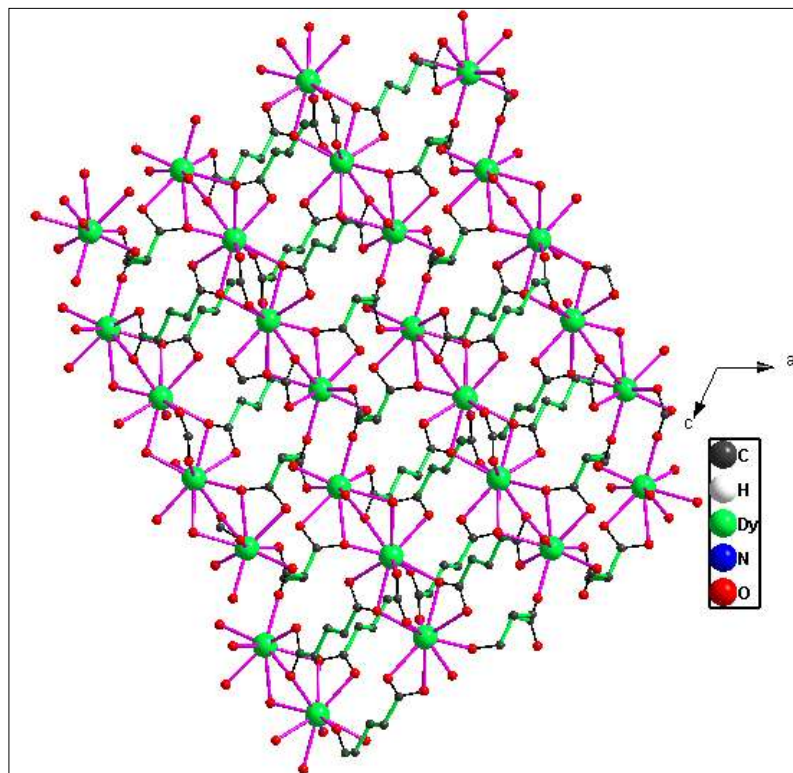

**Figure S8.** Packing of CP 5 along *b*-axis.

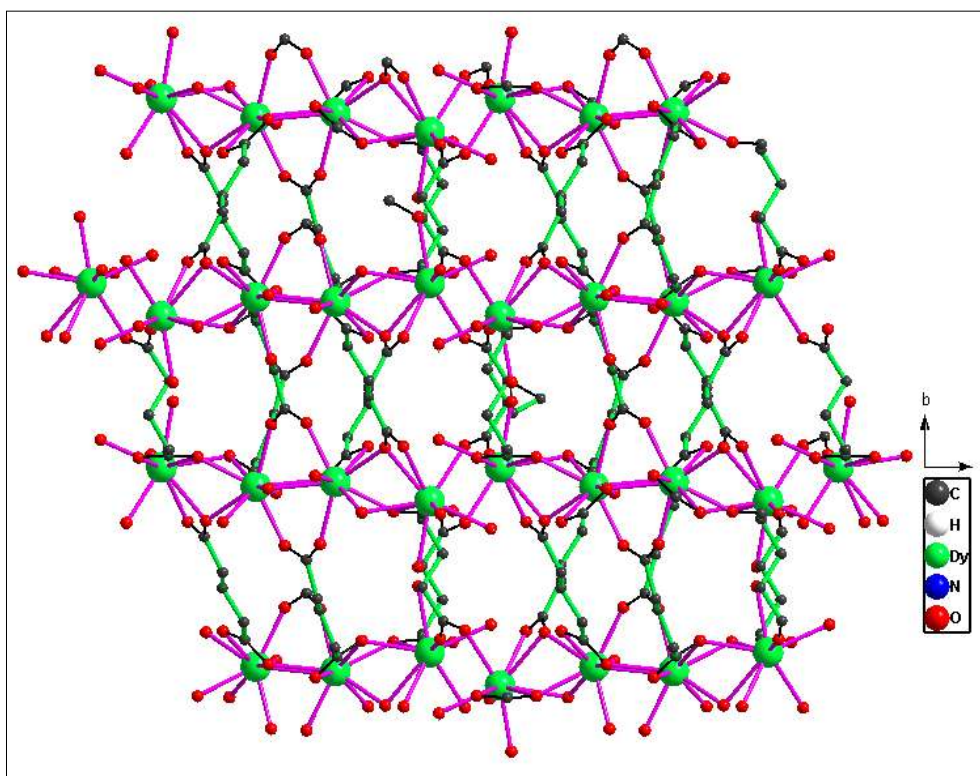

**Figure S9.** Packing of CP 5 along *c*-axis.



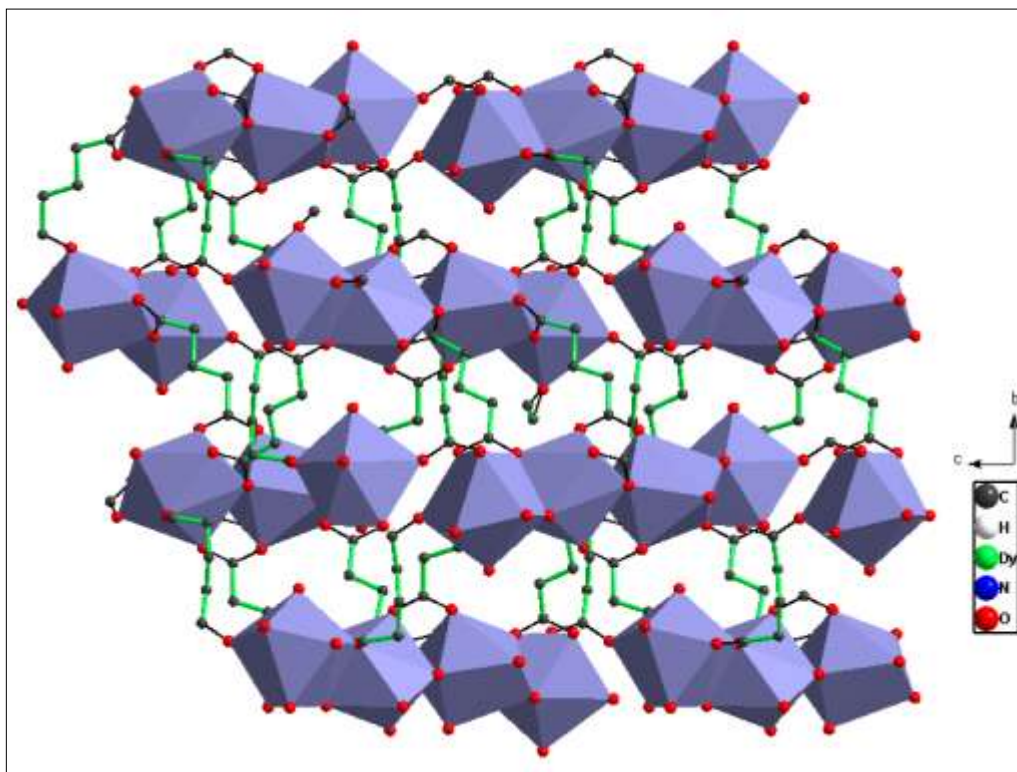

**Figure S10.** Polyhedral packing of CP 5 along *a*-axis.

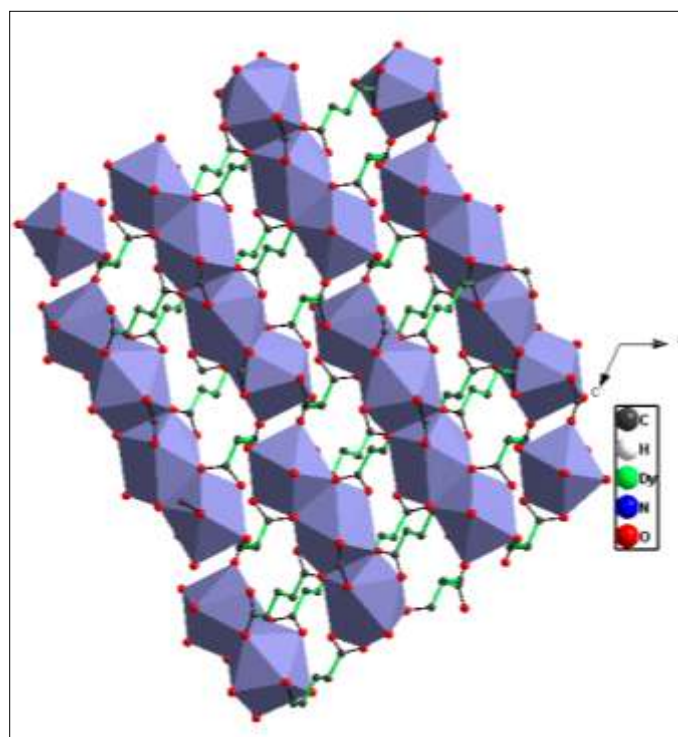

**Figure S11.** Polyhedral packing of CP 5 along *b*-axis.

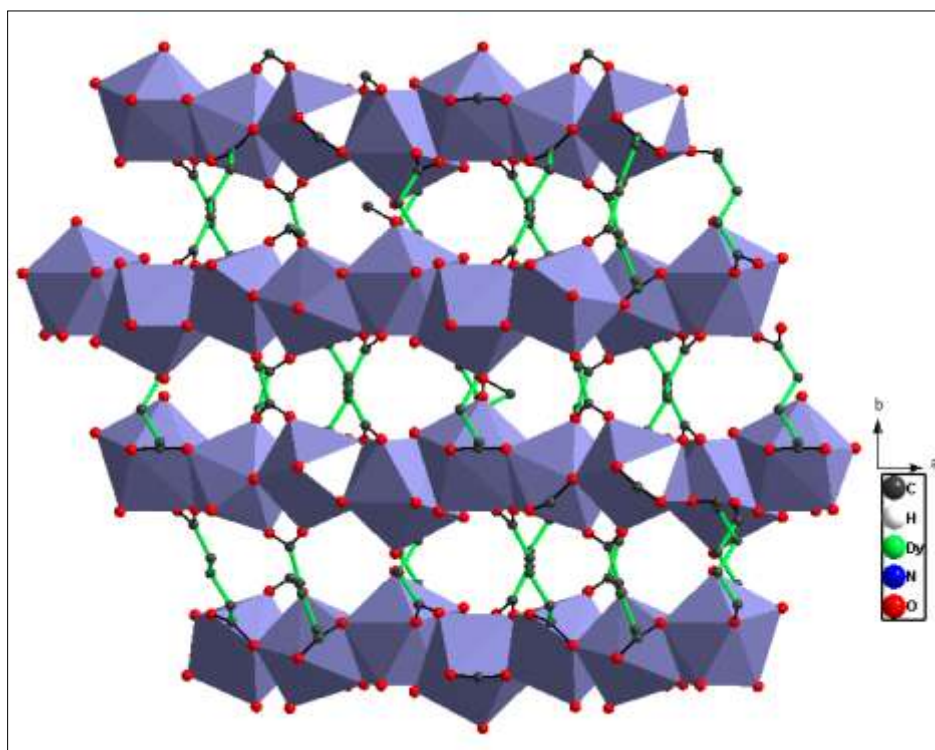

**Figure S12.** Polyhedral packing of CP 5 along *c*-axis.

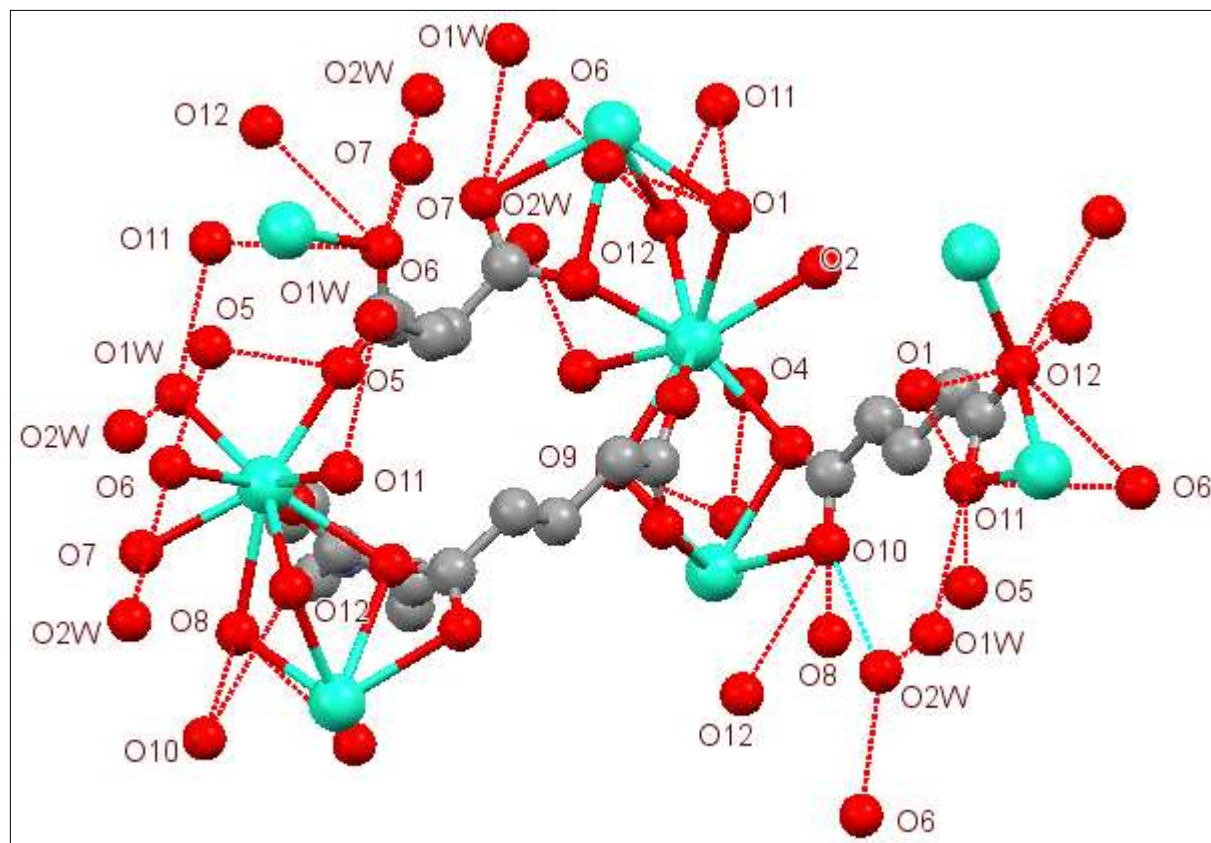

**Figure S13.** Hydrogen bonding geometries of CP 5.

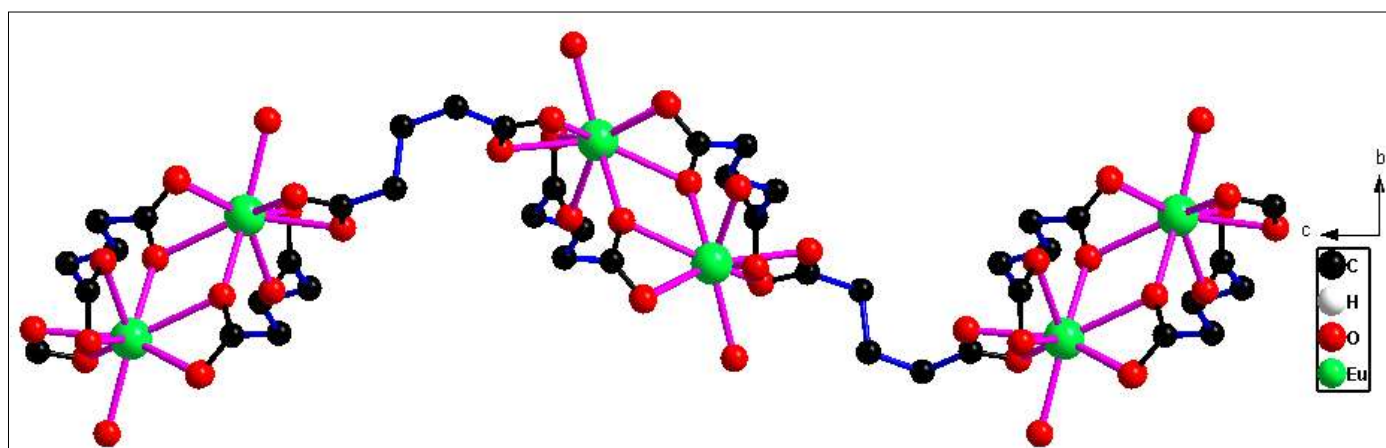

**Figure S14.** Packing of CP 7 along *a*-axis.

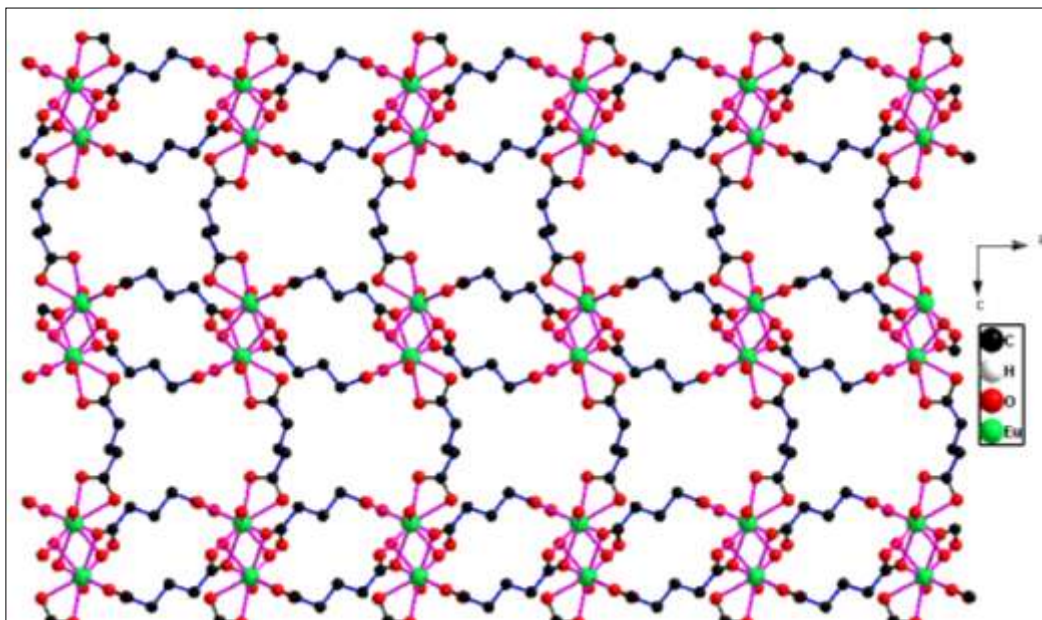

**Figure S15.** Packing of CP 7 along *b*-axis.

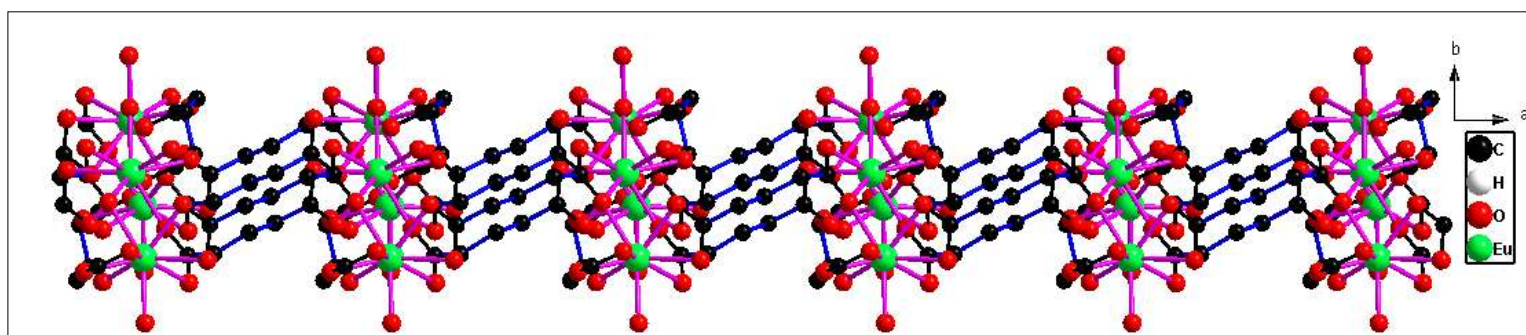

**Figure S16.** Packing of CP 7 along *c*-axis.

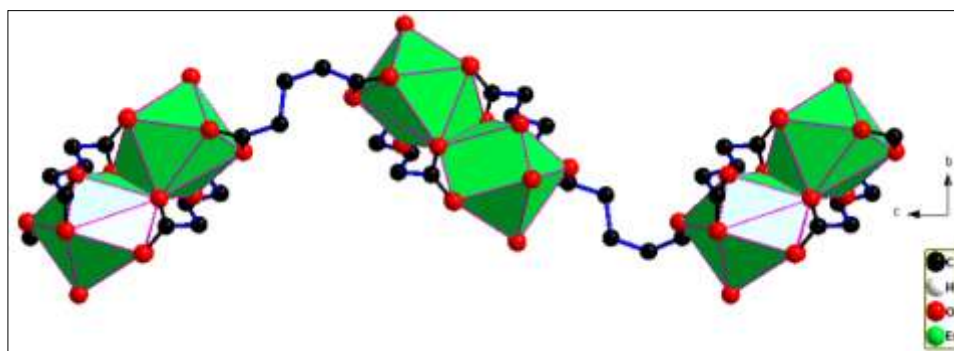

**Figure S17.** Polyhedral packing of CP 7 along *a*-axis.

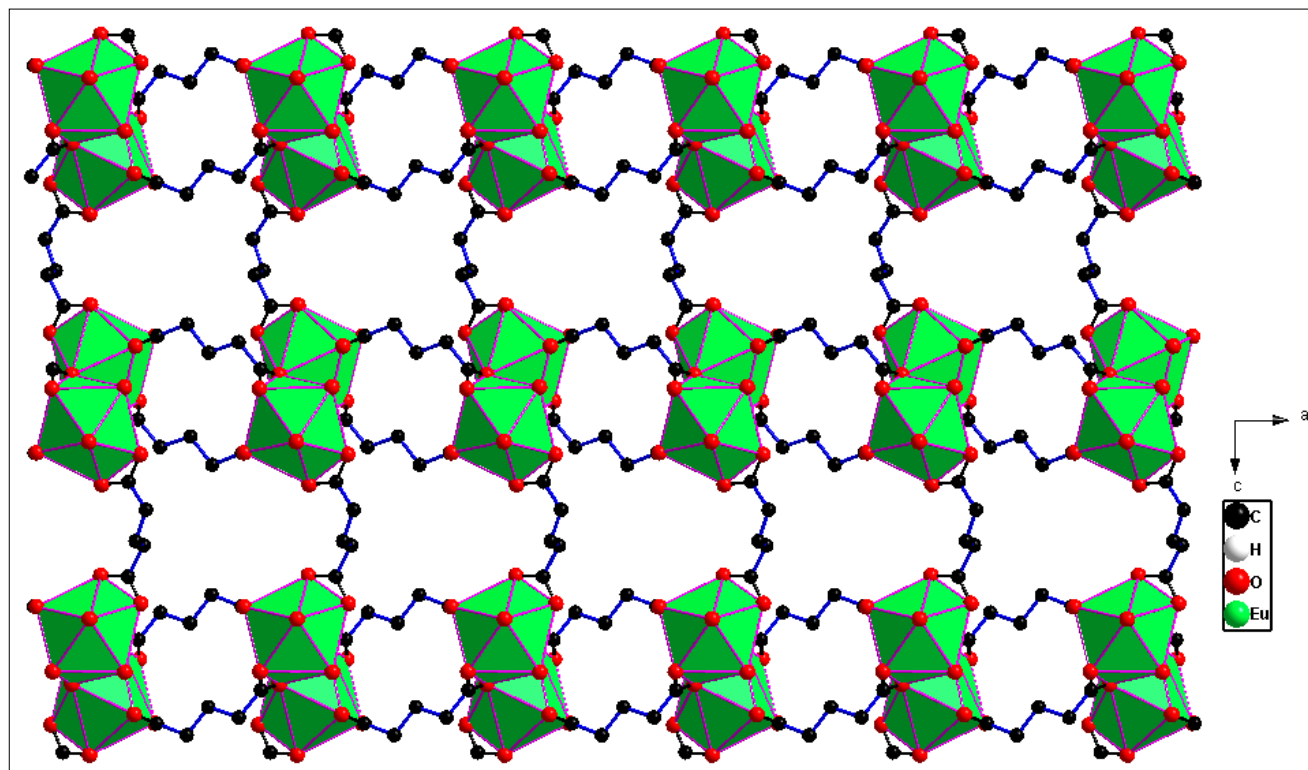

**Figure S18.** Polyhedral packing of CP 7 along *b*-axis.

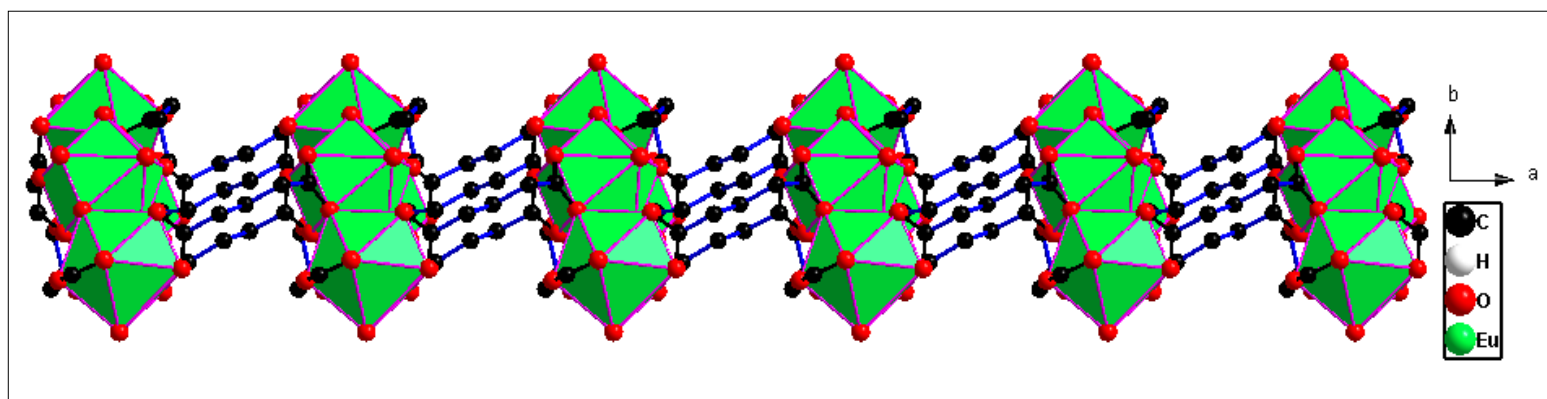

**Figure S19.** Polyhedral packing of CP 7 along *c*-axis.

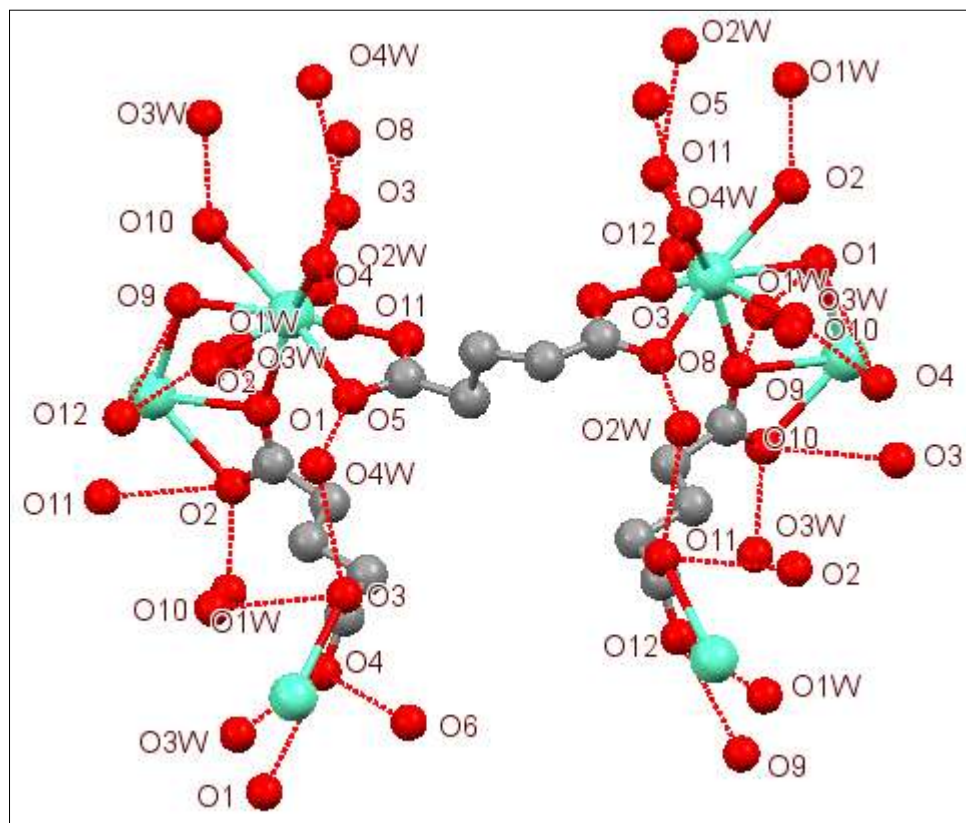

**Figure S20** Hydrogen bonding geometries of CP 7.

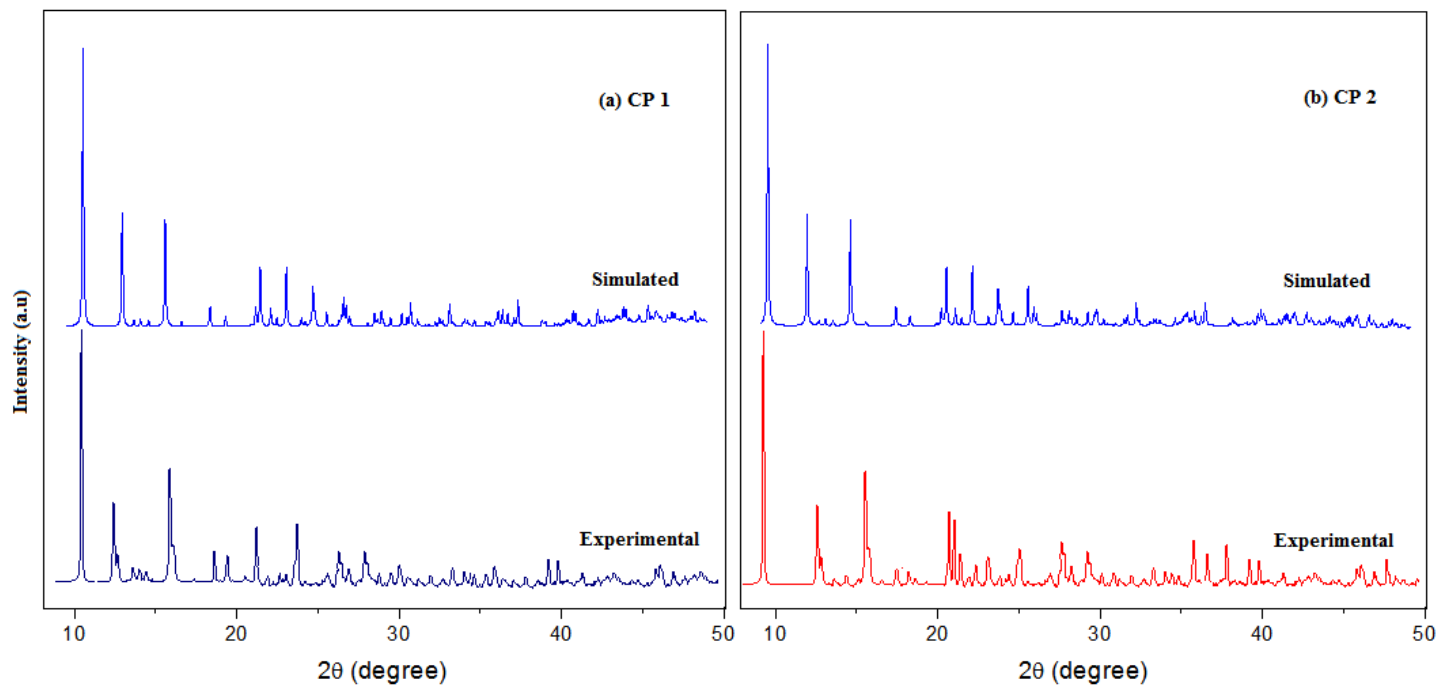

**Figure S21.** PXRd pattern of CP 1 and CP 2.

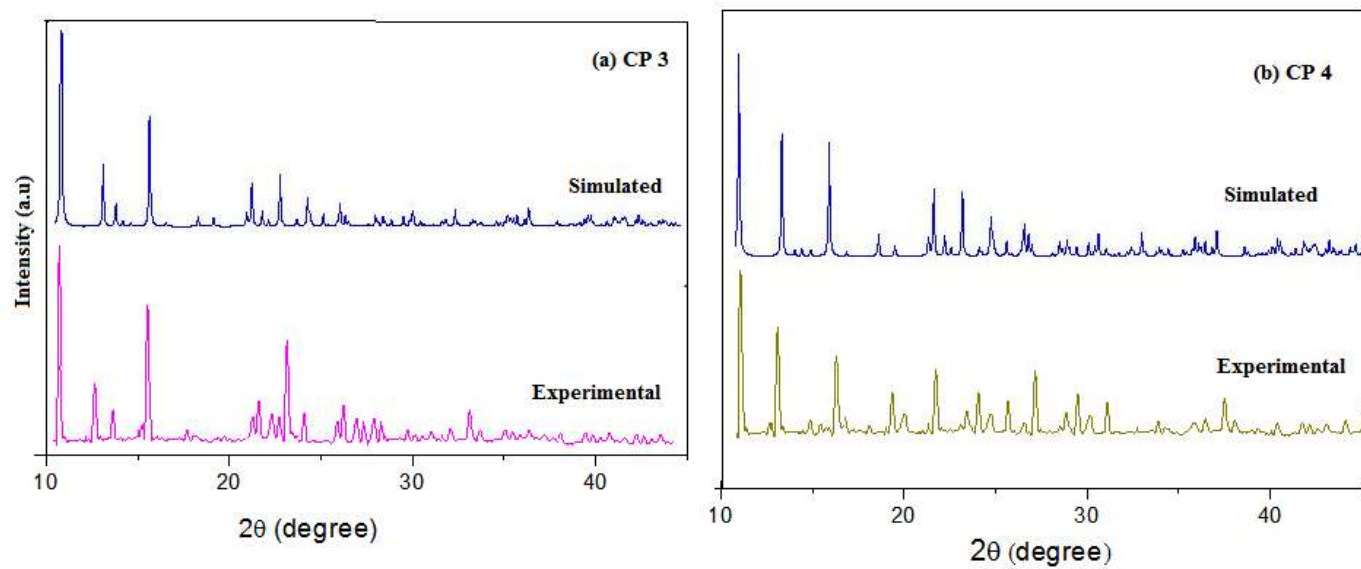

**Figure S22.** PXRd pattern of CP 3 and CP 4.

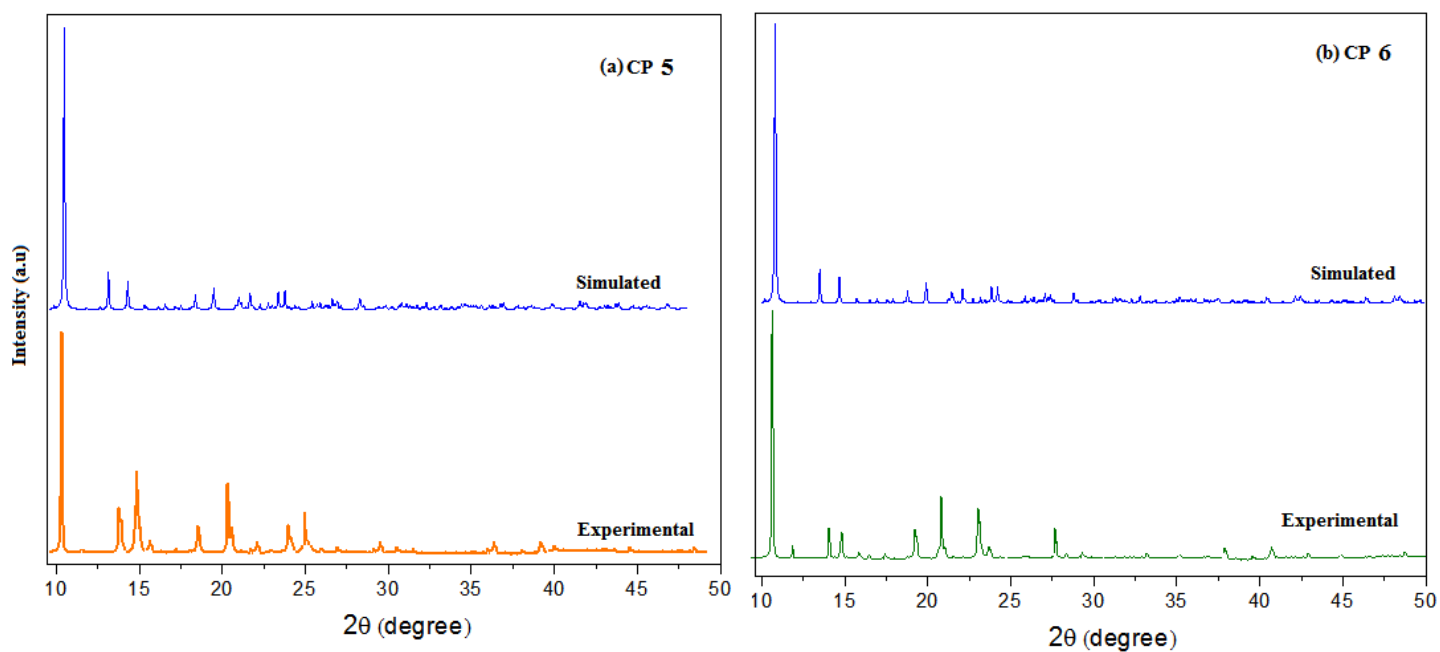

**Figure S23.** PXRD pattern of CP 5 and CP 6.

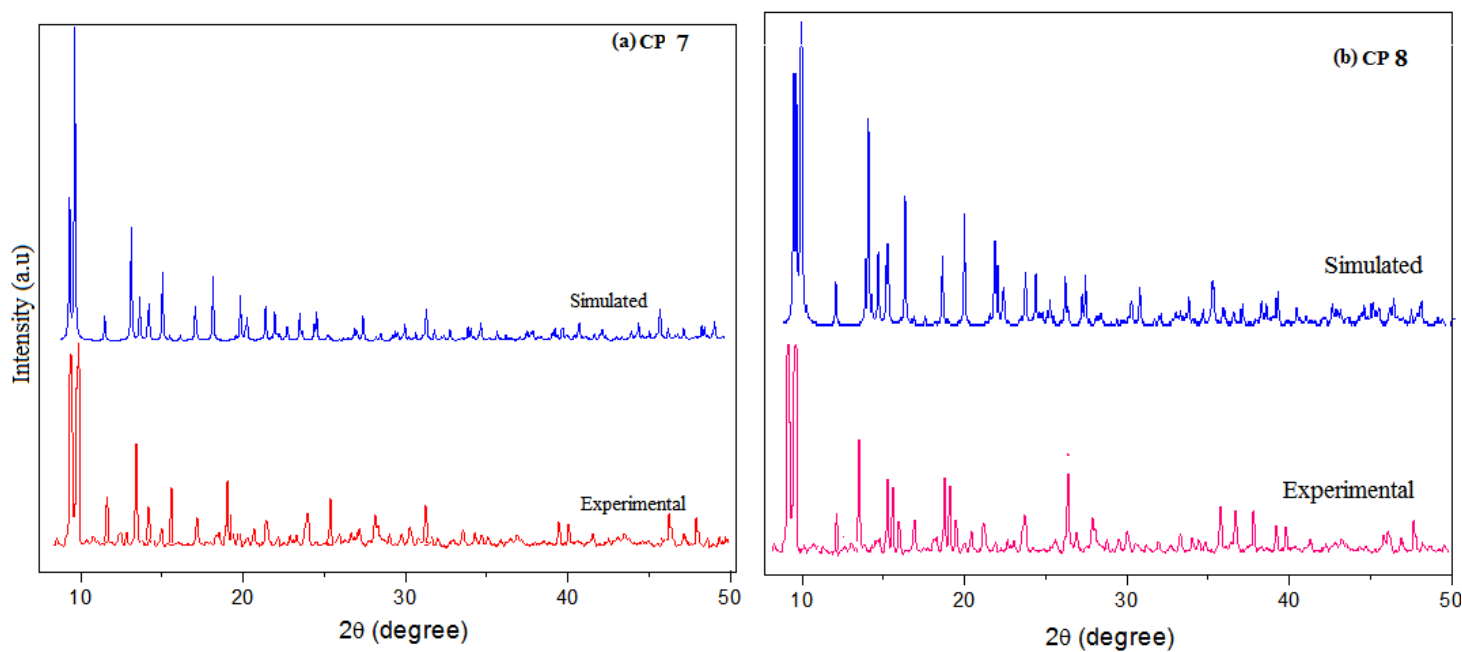

**Figure S24.** PXRD pattern of CP 7 and CP 8.



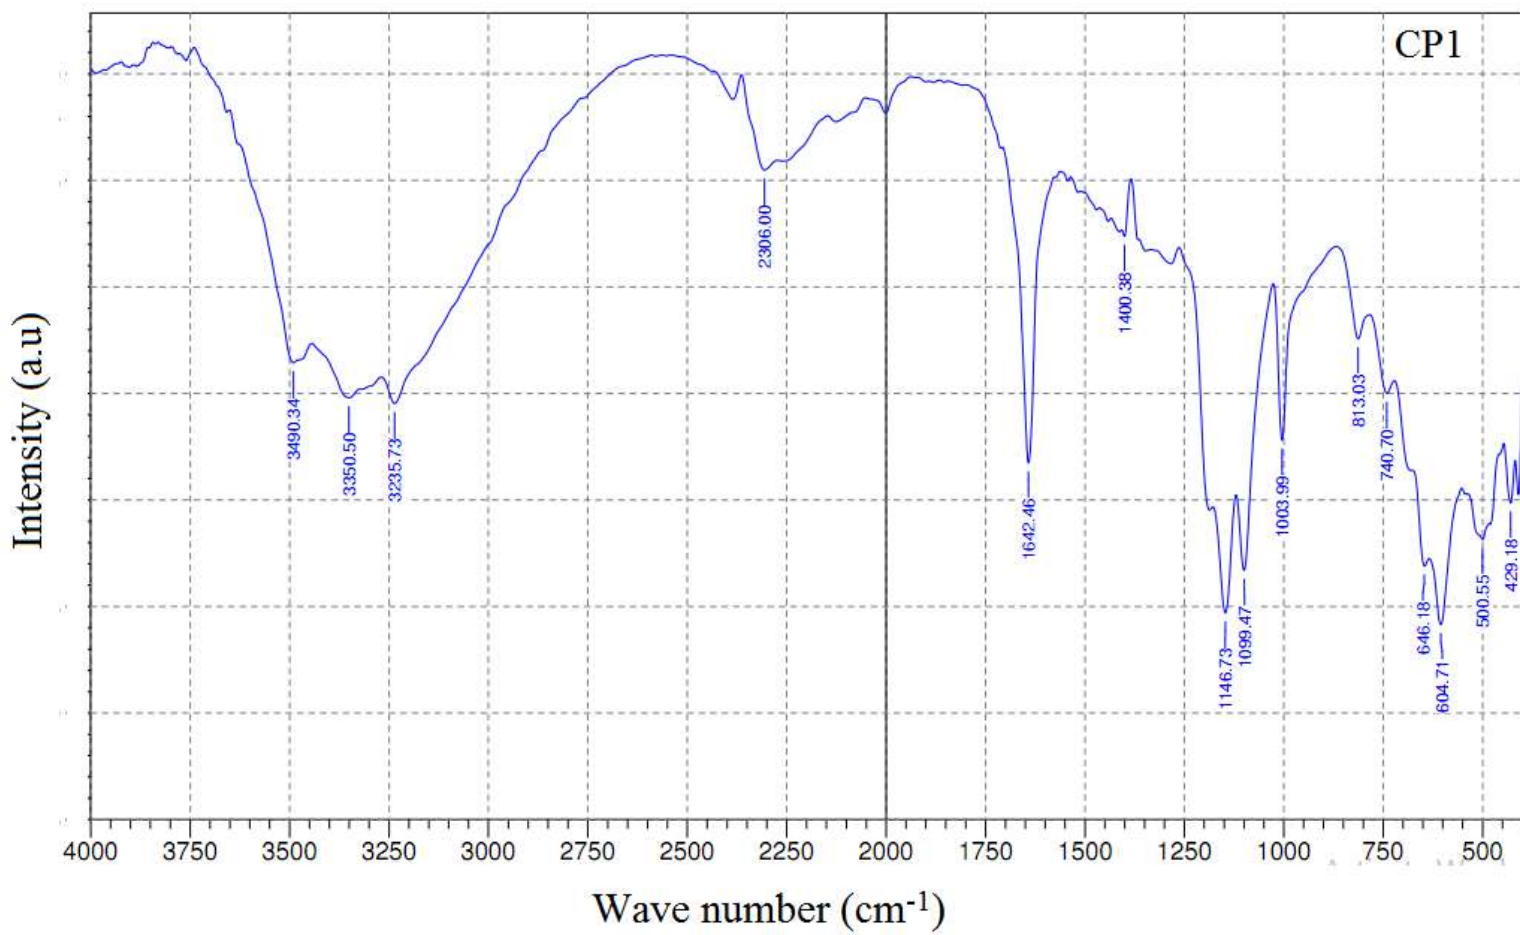

**Figure S25.** FTIR spectrum of CP 1.

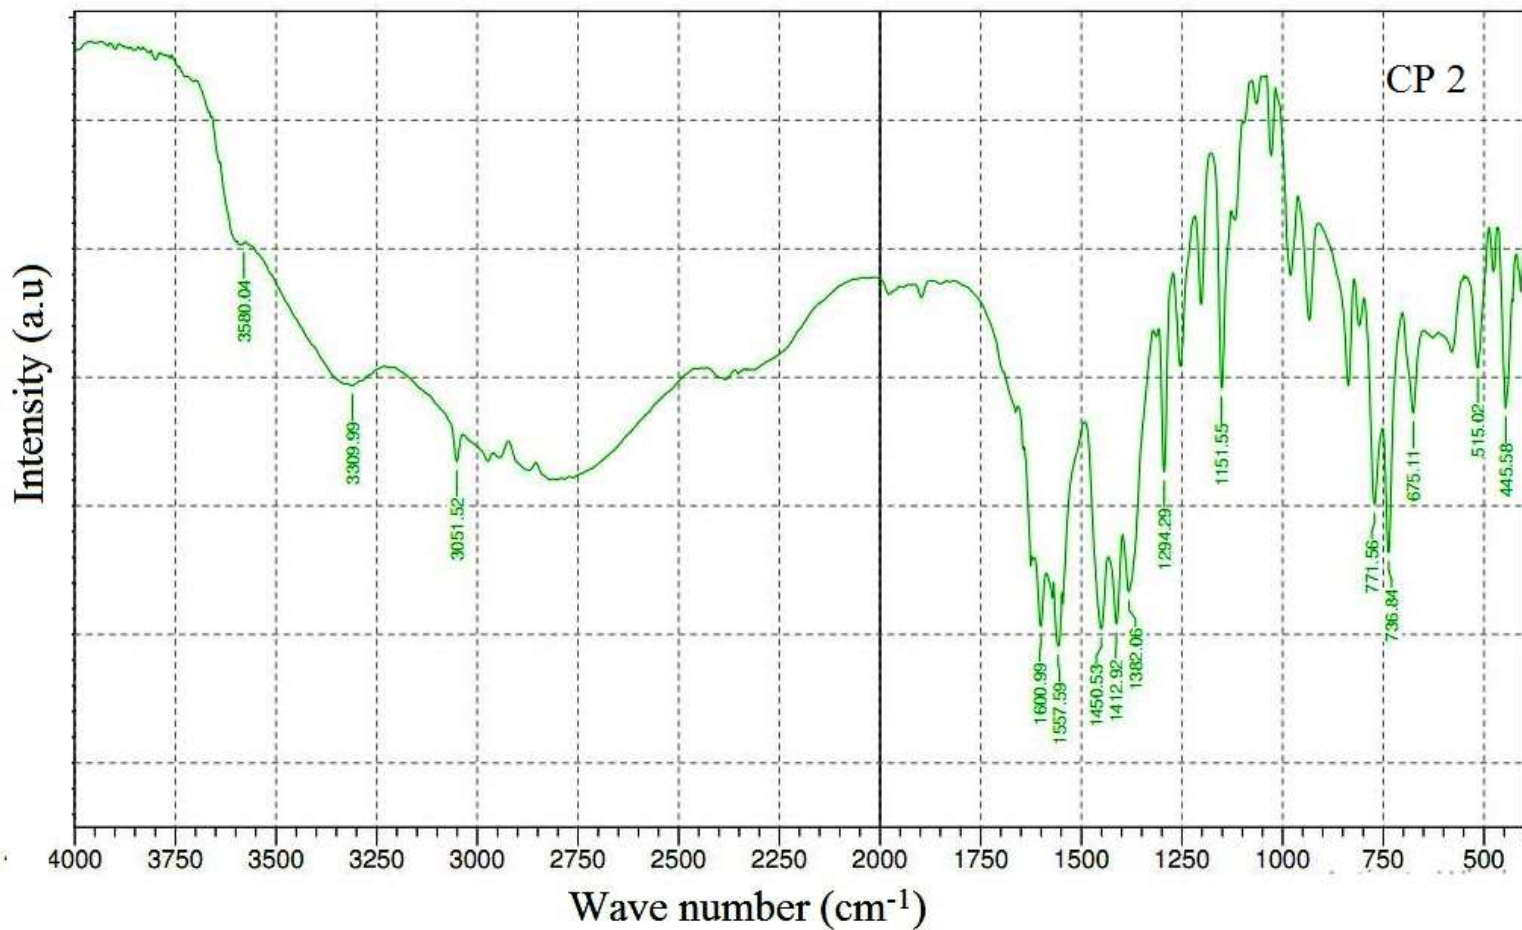

Figure S26. FTIR spectrum of CP 2.

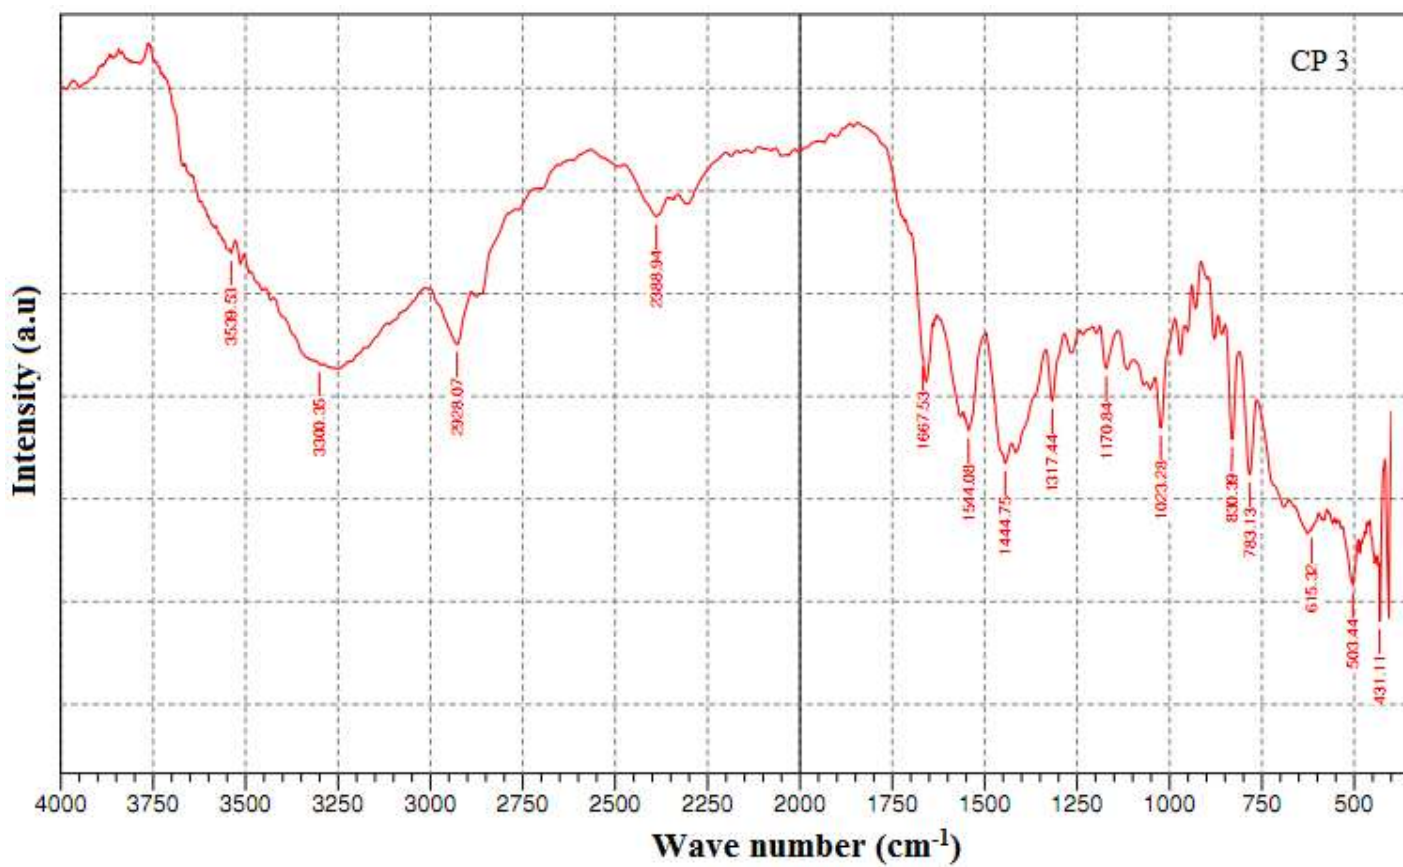

Figure S27. FTIR spectrum of CP 3.

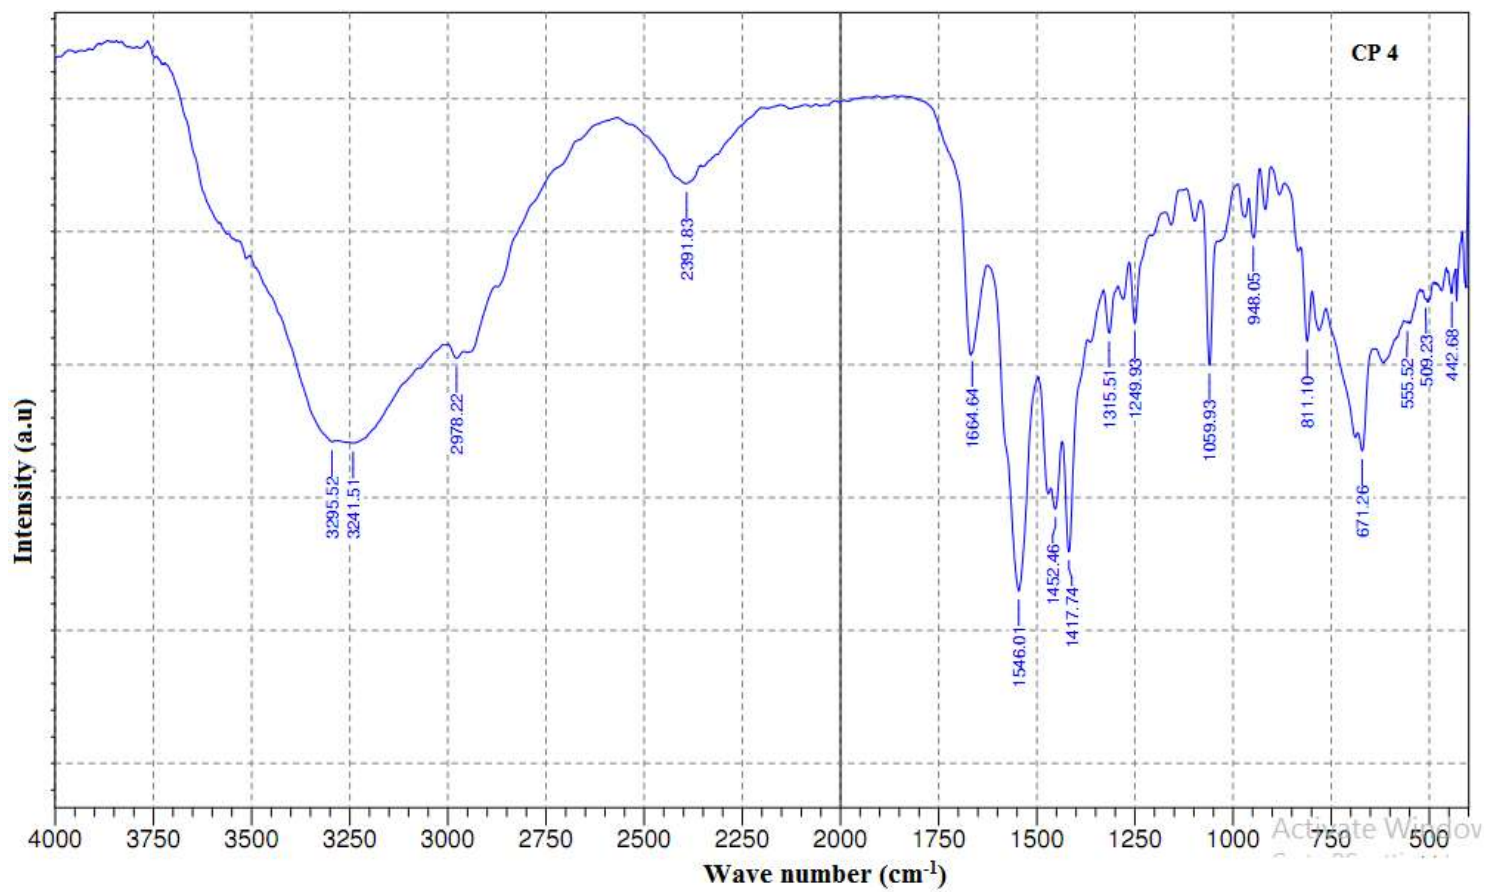

**Figure S28.** FTIR spectrum of CP 4.

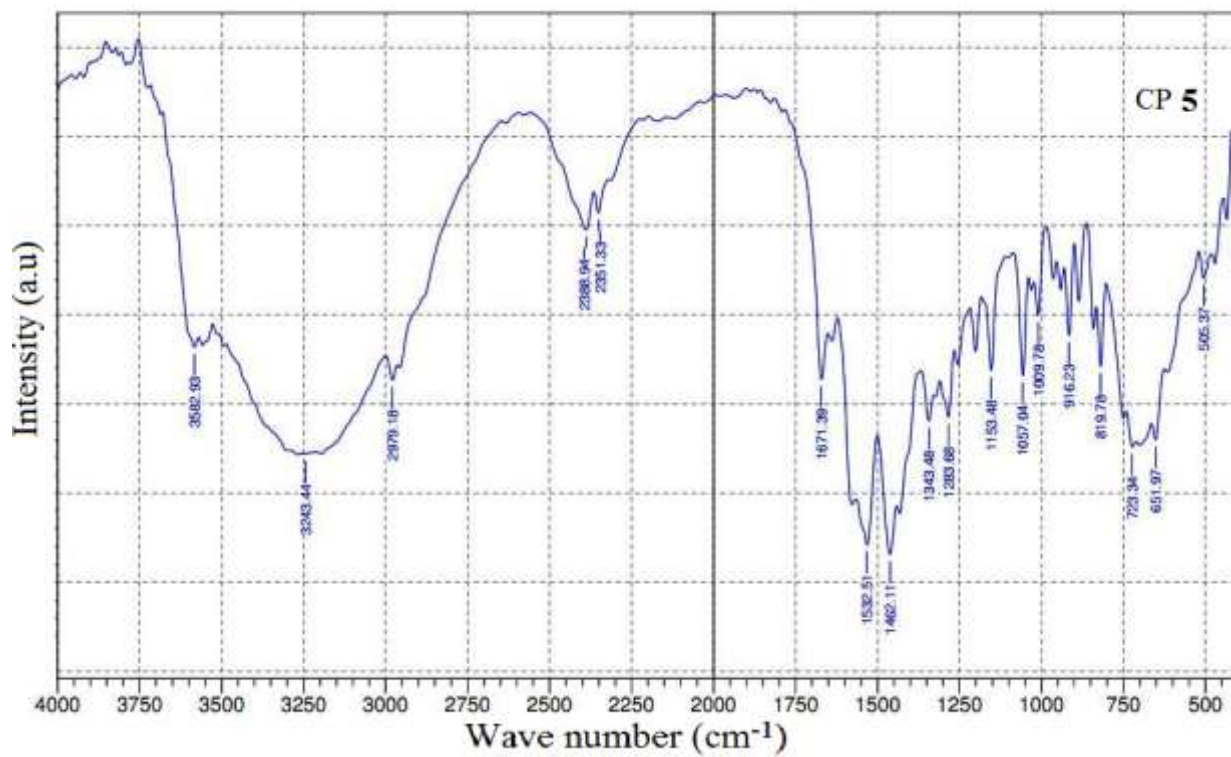

Figure S29. FTIR spectrum of CP 5.

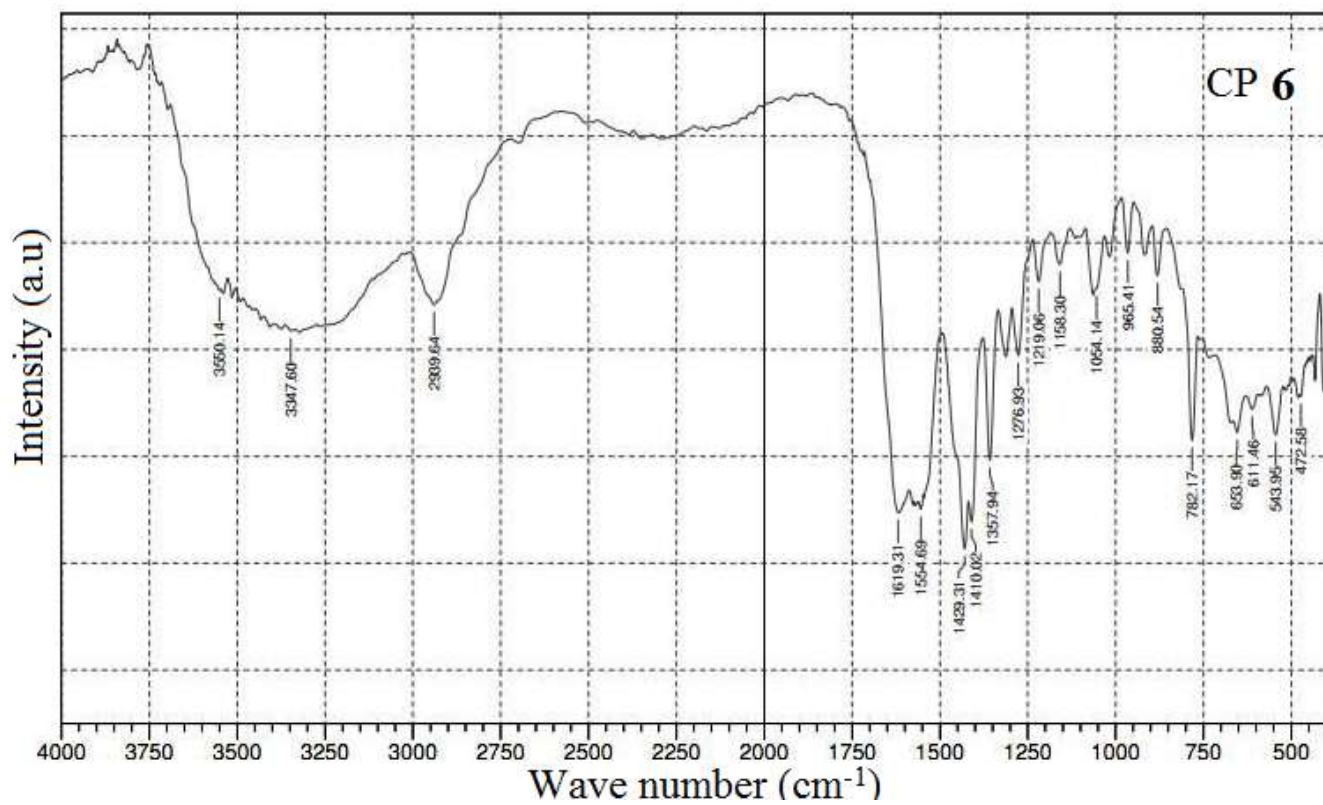

**Figure S30.** FTIR spectrum of CP 6.

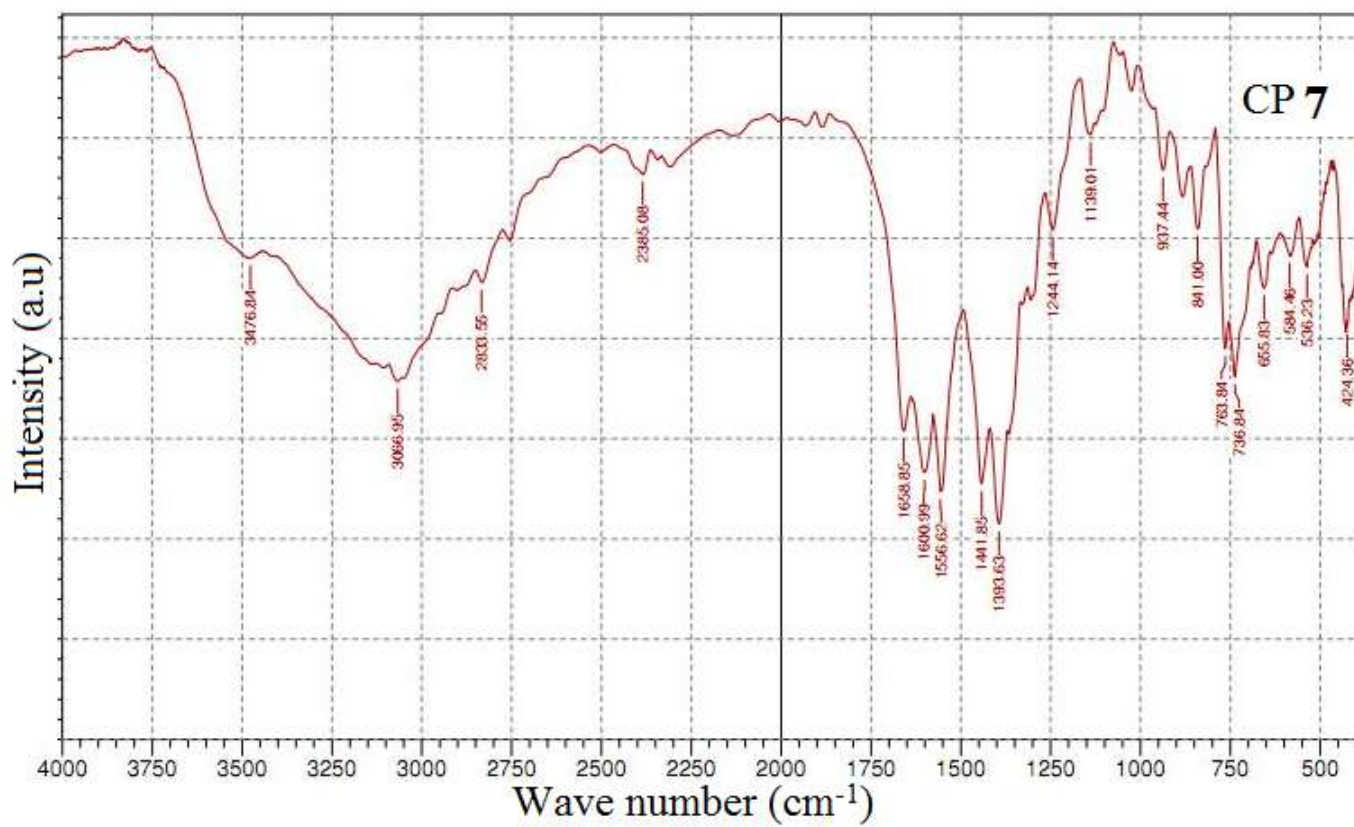

**Figure S31.** FTIR spectrum of CP 7.

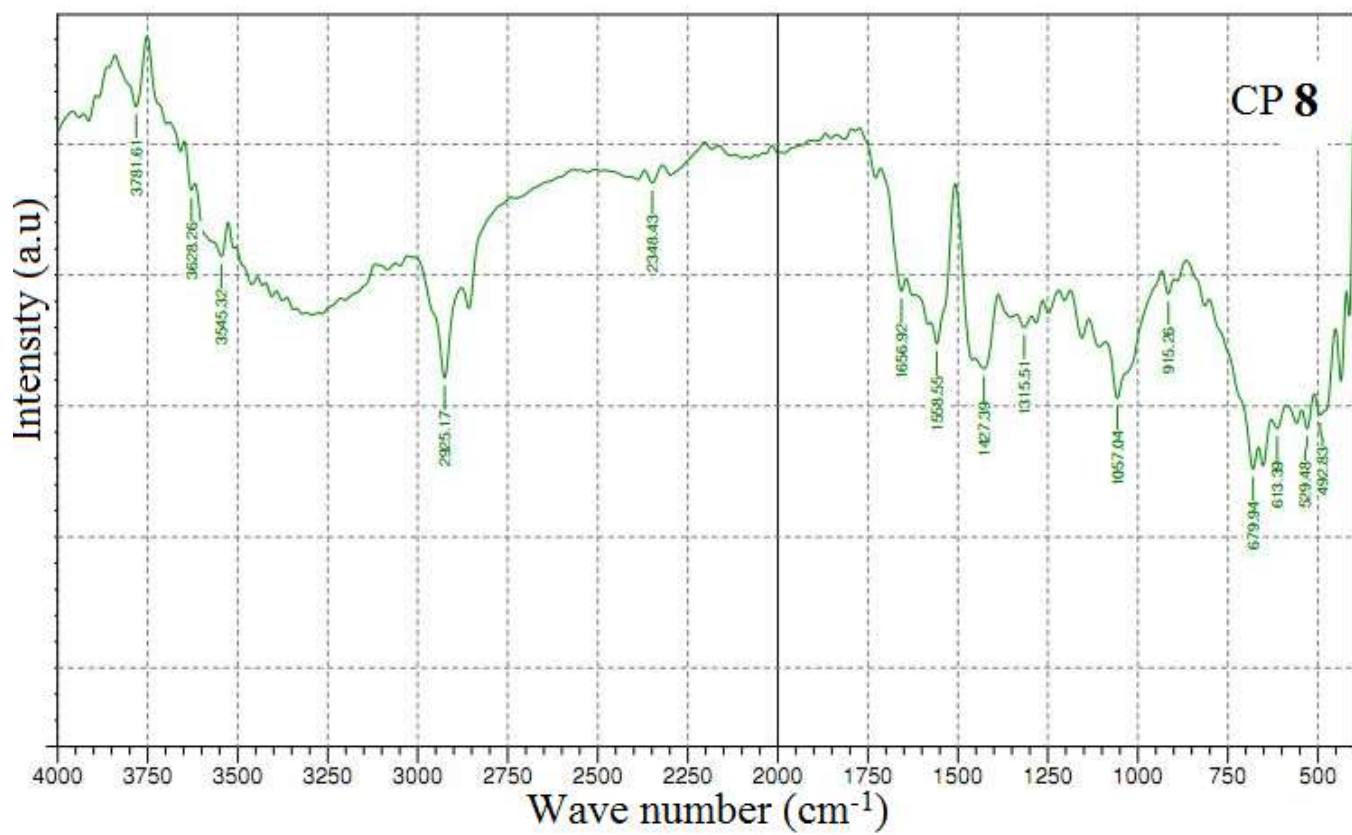

**Figure S32.** FTIR spectrum of CP 8.



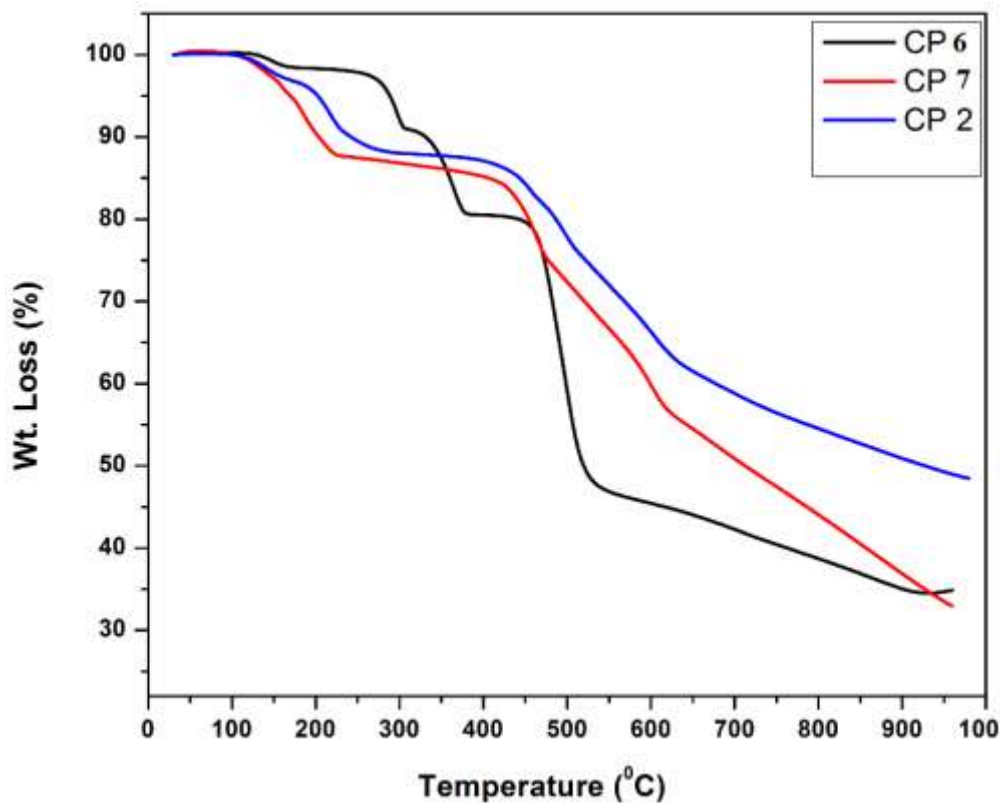

**Figure S33.** TGA Curves for (a) CP 2: blue line (b) CP 6: Black line (c) CP 7: red line.

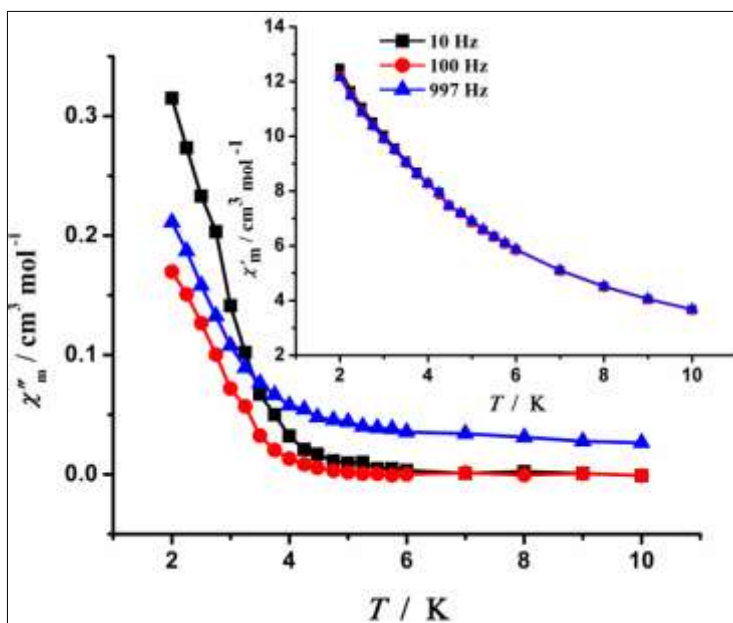

**Figure S34.** Ac signals for CP 5 with 400 Oe dc field.

**Table S1.** Selected Bond lengths (Å) for CP 1.

|                     |           |                       |           |
|---------------------|-----------|-----------------------|-----------|
| Tb1—O3              | 2.450 (3) | Tb1—O5 <sup>ii</sup>  | 2.359 (3) |
| Tb1—O1              | 2.357 (3) | Tb1—O5 <sup>iii</sup> | 2.531 (3) |
| Tb1—O1 <sup>i</sup> | 2.666 (4) | Tb1—O7                | 2.367 (3) |
| Tb1—O4              | 2.405 (4) | Tb1—O6 <sup>iii</sup> | 2.440 (3) |
| Tb1—O2 <sup>i</sup> | 2.396 (4) |                       |           |

Symmetry code(s): (i)  $-x+1, -y+1, -z+1$ ; (ii)  $-x+3/2, -y+1/2, -z+1$ ; (iii)  $x+1/2, y+1/2, z$ .

**Table S2.** Selected Bond angles (°) for CP 1.

|                                      |             |                                         |             |
|--------------------------------------|-------------|-----------------------------------------|-------------|
| O3—Tb1—O1 <sup>i</sup>               | 142.91 (10) | O2 <sup>i</sup> —Tb1—O3                 | 146.23 (11) |
| O3—Tb1—O5 <sup>iii</sup>             | 110.78 (10) | O2 <sup>i</sup> —Tb1—O1 <sup>i</sup>    | 50.72 (10)  |
| O3—Tb1—C1 <sup>i</sup>               | 155.81 (10) | O2 <sup>i</sup> —Tb1—O4                 | 148.07 (11) |
| O3—Tb1—C5 <sup>iii</sup>             | 123.62 (11) | O2 <sup>i</sup> —Tb1—O5 <sup>iii</sup>  | 73.49 (11)  |
| O3—Tb1—C6                            | 26.74 (11)  | O2 <sup>i</sup> —Tb1—O6 <sup>iii</sup>  | 80.57 (11)  |
| O1—Tb1—O3                            | 87.54 (10)  | O2 <sup>i</sup> —Tb1—C1 <sup>i</sup>    | 24.83 (11)  |
| O1—Tb1—O1 <sup>i</sup>               | 66.23 (14)  | O2 <sup>i</sup> —Tb1—C5 <sup>iii</sup>  | 75.56 (12)  |
| O1—Tb1—O4                            | 79.94 (13)  | O2 <sup>i</sup> —Tb1—C6                 | 159.58 (11) |
| O1—Tb1—O2 <sup>i</sup>               | 116.89 (12) | O5 <sup>ii</sup> —Tb1—O3                | 76.76 (10)  |
| O1—Tb1—O5 <sup>ii</sup>              | 162.15 (10) | O5 <sup>ii</sup> —Tb1—O1 <sup>i</sup>   | 122.95 (11) |
| O1—Tb1—O5 <sup>iii</sup>             | 128.19 (10) | O5 <sup>iii</sup> —Tb1—O1 <sup>i</sup>  | 106.11 (9)  |
| O1—Tb1—O7                            | 79.77 (12)  | O5 <sup>ii</sup> —Tb1—O4                | 96.92 (11)  |
| O1—Tb1—O6 <sup>iii</sup>             | 78.42 (10)  | O5 <sup>ii</sup> —Tb1—O2 <sup>i</sup>   | 74.68 (10)  |
| O1—Tb1—C1 <sup>i</sup>               | 92.06 (12)  | O5 <sup>ii</sup> —Tb1—O5 <sup>iii</sup> | 66.64 (11)  |
| O1 <sup>i</sup> —Tb1—C1 <sup>i</sup> | 25.96 (10)  | O5 <sup>ii</sup> —Tb1—O7                | 88.60 (11)  |
| O1—Tb1—C5 <sup>iii</sup>             | 103.23 (11) | O5 <sup>ii</sup> —Tb1—O6 <sup>iii</sup> | 118.18 (10) |

|                                        |             |                                          |             |
|----------------------------------------|-------------|------------------------------------------|-------------|
| O1 <sup>i</sup> —Tb1—C5 <sup>iii</sup> | 89.03 (10)  | O7—Tb1—O3                                | 77.99 (10)  |
| O1 <sup>i</sup> —Tb1—C6                | 149.65 (11) | O7—Tb1—O1 <sup>i</sup>                   | 72.08 (10)  |
| O1—Tb1—C6                              | 83.42 (12)  | O7—Tb1—O4                                | 127.53 (11) |
| O4—Tb1—O3                              | 53.27 (10)  | O7—Tb1—O2 <sup>i</sup>                   | 83.65 (12)  |
| O4—Tb1—O1 <sup>i</sup>                 | 137.61 (11) | O7—Tb1—O5 <sup>iii</sup>                 | 149.73 (11) |
| O4—Tb1—O5 <sup>iii</sup>               | 74.92 (10)  | O7—Tb1—O6 <sup>iii</sup>                 | 143.44 (10) |
| O4—Tb1—O6 <sup>iii</sup>               | 76.54 (11)  | O6 <sup>iii</sup> —Tb1—O3                | 129.57 (11) |
| O4—Tb1—C1 <sup>i</sup>                 | 150.20 (10) | O6 <sup>iii</sup> —Tb1—O1 <sup>i</sup>   | 72.39 (10)  |
| O4—Tb1—C5 <sup>iii</sup>               | 74.11 (11)  | O6 <sup>iii</sup> —Tb1—O5 <sup>iii</sup> | 52.13 (9)   |
| O4—Tb1—C6                              | 26.53 (11)  |                                          |             |

Symmetry code(s): (i)  $-x+1, -y+1, -z+1$ ; (ii)  $-x+3/2, -y+1/2, -z+1$ ; (iii)  $x+1/2, y+1/2, z$ .

**Table S3.** Selected Hydrogen bonding geometries for CP 1.

| $D-H\cdots A$                   | $D-H$ (Å) | $H\cdots A$ (Å) | $D\cdots A$ (Å) | $D-H\cdots A$ (°) |
|---------------------------------|-----------|-----------------|-----------------|-------------------|
| O7—H7A $\cdots$ O3 <sup>i</sup> | 0.85      | 1.94            | 2.700 (4)       | 148.3             |
| O8—H8D $\cdots$ O9              | 0.85      | 2.04            | 2.645 (17)      | 127.7             |

Symmetry code(s): (i)  $-x+3/2, -y+1/2, -z+1$ .

**Table S4.** Selected Bond lengths (Å) for CP 2.

|                      |           |                       |           |
|----------------------|-----------|-----------------------|-----------|
| O1—Sm1               | 2.406 (3) | O3—Sm1 <sup>iii</sup> | 2.560 (2) |
| O1—Sm1 <sup>i</sup>  | 2.648 (3) | O4—Sm1 <sup>iii</sup> | 2.483 (2) |
| O2—Sm1 <sup>i</sup>  | 2.448 (3) | O5—Sm1                | 2.445 (3) |
| O1W—Sm1              | 2.408 (2) | O6—Sm1                | 2.481 (2) |
| O3—Sm1 <sup>ii</sup> | 2.401 (2) |                       |           |

Symmetry code(s): (i)  $-x+1, -y+1, -z+1$ ; (ii)  $-x+3/2, -y+1/2, -z+1$ ; (iii)  $x-1/2, y-1/2, z$ .

**Table S5.** Selected Bond angles (°) for CP 2.

|                                        |             |                                        |             |
|----------------------------------------|-------------|----------------------------------------|-------------|
| O3 <sup>ii</sup> —Sm1—O1               | 162.05 (8)  | O5—Sm1—O4 <sup>iv</sup>                | 76.05 (9)   |
| O3 <sup>ii</sup> —Sm1—O1W              | 88.43 (9)   | O2 <sup>i</sup> —Sm1—O4 <sup>iv</sup>  | 80.69 (10)  |
| O1—Sm1—O1W                             | 79.73 (10)  | O6—Sm1—O4 <sup>iv</sup>                | 128.64 (9)  |
| O3 <sup>ii</sup> —Sm1—O5               | 97.08 (10)  | O3 <sup>ii</sup> —Sm1—O3 <sup>iv</sup> | 67.06 (9)   |
| O1—Sm1—O5                              | 79.86 (10)  | O1—Sm1—O3 <sup>iv</sup>                | 127.93 (8)  |
| O1W—Sm1—O5                             | 127.27 (9)  | O1W—Sm1—O3 <sup>iv</sup>               | 150.05 (10) |
| O3 <sup>ii</sup> —Sm1—O2 <sup>i</sup>  | 74.61 (9)   | O5—Sm1—O3 <sup>iv</sup>                | 74.91 (9)   |
| O1—Sm1—O2 <sup>i</sup>                 | 117.03 (9)  | O2 <sup>i</sup> —Sm1—O3 <sup>iv</sup>  | 73.24 (10)  |
| O1W—Sm1—O2 <sup>i</sup>                | 84.15 (11)  | O6—Sm1—O3 <sup>iv</sup>                | 110.20 (8)  |
| O5—Sm1—O2 <sup>i</sup>                 | 147.82 (10) | O4 <sup>iv</sup> —Sm1—O3 <sup>iv</sup> | 51.51 (8)   |
| O3 <sup>ii</sup> —Sm1—O6               | 76.46 (9)   | O3 <sup>ii</sup> —Sm1—O1 <sup>i</sup>  | 122.63 (9)  |
| O1—Sm1—O6                              | 87.89 (9)   | O1—Sm1—O1 <sup>i</sup>                 | 66.59 (10)  |
| O1W—Sm1—O6                             | 78.43 (9)   | O1W—Sm1—O1 <sup>i</sup>                | 72.51 (8)   |
| O5—Sm1—O6                              | 52.74 (8)   | O5—Sm1—O1 <sup>i</sup>                 | 137.67 (9)  |
| O2 <sup>i</sup> —Sm1—O6                | 146.46 (9)  | O2 <sup>i</sup> —Sm1—O1 <sup>i</sup>   | 50.51 (9)   |
| O3 <sup>ii</sup> —Sm1—O4 <sup>iv</sup> | 118.03 (8)  | O6—Sm1—O1 <sup>i</sup>                 | 143.99 (8)  |
| O1—Sm1—O4 <sup>iv</sup>                | 78.64 (8)   | O4 <sup>iv</sup> —Sm1—O1 <sup>i</sup>  | 72.75 (8)   |
| O1W—Sm1—O4 <sup>iv</sup>               | 144.15 (9)  | O3 <sup>iv</sup> —Sm1—O1 <sup>i</sup>  | 105.59 (8)  |

Symmetry code(s): (i)  $-x+1, -y+1, -z+1$ ; (ii)  $-x+3/2, -y+1/2, -z+1$ ; (iii)  $x-1/2, y-1/2, z$ ; (iv)  $x+1/2, y+1/2, z$ .

**Table S6.** Selected Hydrogen bonding geometries for CP 2.

| D       | H               | A | d(D-H)/Å  | d(H-A)/Å  | d(D-A)/Å  | D-H-A/° |
|---------|-----------------|---|-----------|-----------|-----------|---------|
| O1WH1WA | O6 <sup>1</sup> |   | 0.814(18) | 1.872(19) | 2.683(3)  | 174(5)  |
| O1WH1WB | O4 <sup>2</sup> |   | 0.816(18) | 2.06(3)   | 2.826(4)  | 157(5)  |
| O3WH3WB | O2W             |   | 0.81(2)   | 1.90(5)   | 2.688(18) | 164(16) |

Symmetry code(s): <sup>1</sup>3/2-X,1/2-Y,1-Z; <sup>2</sup>1/2-X,1/2-Y,1-Z**Table S7.** Selected Bond lengths (Å) for CP 3.

|                       |           |                      |            |
|-----------------------|-----------|----------------------|------------|
| Eu1—O1                | 2.395 (5) | C1—C2                | 1.495 (9)  |
| Eu1—O1 <sup>i</sup>   | 2.642 (5) | C5—C4                | 1.492 (9)  |
| Eu1—O3 <sup>ii</sup>  | 2.559 (5) | C6—C7                | 1.507 (9)  |
| Eu1—O3 <sup>iii</sup> | 2.390 (4) | C2—H2a               | 0.9700     |
| Eu1—O6                | 2.440 (5) | C2—H2b               | 0.9700     |
| Eu1—O5                | 2.477 (5) | C2—C3                | 1.537 (9)  |
| Eu1—O2 <sup>i</sup>   | 2.429 (5) | C4—H4a               | 0.9700     |
| Eu1—O7                | 2.400 (5) | C4—H4b               | 0.9700     |
| Eu1—O4 <sup>ii</sup>  | 2.469 (5) | C4—C3                | 1.516 (10) |
| Eu1—C1 <sup>i</sup>   | 2.932 (6) | C7—H7c               | 0.9700     |
| Eu1—C5 <sup>ii</sup>  | 2.900 (7) | C7—H7d               | 0.9700     |
| Eu1—C6                | 2.841 (6) | C7—C8                | 1.530 (8)  |
| O1—C1                 | 1.283 (8) | C8—H8a               | 0.9700     |
| O3—C5                 | 1.268 (8) | C8—H8a <sup>iv</sup> | 0.9700     |
| O6—C6                 | 1.261 (8) | C8—H8b <sup>iv</sup> | 0.9700     |
| O5—C6                 | 1.275 (8) | C8—H8b               | 0.9700     |

|        |           |                       |        |
|--------|-----------|-----------------------|--------|
| O2—C1  | 1.255 (8) | H8a—H8b <sup>iv</sup> | 0.0000 |
| O7—H7a | 0.8618    | C3—H3a                | 0.9700 |
| O7—H7b | 0.8612    | C3—H3b                | 0.9700 |
| O4—C5  | 1.262 (8) |                       |        |

Symmetry code(s): (i)  $-x+1, -y+1, -z+1$ ; (ii)  $x+1/2, y-1/2, z$ ; (iii)  $-x+3/2, -y+3/2, -z+1$ ; (iv)  $-x+2, y, -z+3/2$ .

**Table S8.** Selected Bond angles (°) for CP 3.

|                                        |             |                        |           |
|----------------------------------------|-------------|------------------------|-----------|
| O3 <sup>iii</sup> —Eu1—O1              | 162.00 (16) | C5—O3—Eu1 <sup>v</sup> | 92.3 (4)  |
| O3 <sup>iii</sup> —Eu1—O1 <sup>i</sup> | 122.99 (16) | C6—O6—Eu1              | 94.9 (4)  |
| O3 <sup>ii</sup> —Eu1—O1               | 127.82 (16) | C6—O5—Eu1              | 92.8 (4)  |
| O3 <sup>ii</sup> —Eu1—O1 <sup>i</sup>  | 105.63 (15) | C1—O2—Eu1 <sup>i</sup> | 100.6 (4) |
| O6—Eu1—O1                              | 79.98 (18)  | H7a—O7—Eu1             | 110.1     |
| O6—Eu1—O1 <sup>i</sup>                 | 137.73 (16) | H7b—O7—Eu1             | 109.7     |
| O6—Eu1—O3 <sup>iii</sup>               | 96.79 (18)  | H7b—O7—H7a             | 108.8     |
| O6—Eu1—O3 <sup>ii</sup>                | 75.07 (17)  | C5—O4—Eu1 <sup>v</sup> | 96.7 (4)  |
| O5—Eu1—O1                              | 88.13 (17)  | O1—C1—Eu1 <sup>i</sup> | 64.3 (3)  |
| O5—Eu1—O1 <sup>i</sup>                 | 143.71 (15) | O2—C1—Eu1 <sup>i</sup> | 54.5 (3)  |
| O5—Eu1—O3 <sup>iii</sup>               | 76.08 (16)  | O2—C1—O1               | 118.6 (6) |
| O5—Eu1—O3 <sup>ii</sup>                | 110.46 (16) | C2—C1—Eu1 <sup>i</sup> | 170.3 (5) |
| O5—Eu1—O6                              | 52.88 (16)  | C2—C1—O1               | 121.9 (6) |
| O2 <sup>i</sup> —Eu1—O1                | 117.01 (17) | C2—C1—O2               | 119.4 (6) |
| O2 <sup>i</sup> —Eu1—O1 <sup>i</sup>   | 50.78 (15)  | O3—C5—Eu1 <sup>v</sup> | 61.8 (3)  |
| O2 <sup>i</sup> —Eu1—O3 <sup>iii</sup> | 74.75 (17)  | O4—C5—Eu1 <sup>v</sup> | 57.7 (3)  |

|                                         |             |                        |           |
|-----------------------------------------|-------------|------------------------|-----------|
| O2 <sup>i</sup> —Eu1—O3 <sup>ii</sup>   | 73.10 (18)  | O4—C5—O3               | 119.6 (6) |
| O2 <sup>i</sup> —Eu1—O6                 | 147.88 (19) | C4—C5—Eu1 <sup>v</sup> | 178.5 (5) |
| O2 <sup>i</sup> —Eu1—O5                 | 146.13 (17) | C4—C5—O3               | 118.9 (6) |
| O7—Eu1—O1                               | 79.54 (18)  | C4—C5—O4               | 121.5 (6) |
| O7—Eu1—O1 <sup>i</sup>                  | 72.13 (16)  | O6—C6—Eu1              | 58.8 (4)  |
| O7—Eu1—O3 <sup>iii</sup>                | 88.72 (17)  | O5—C6—Eu1              | 60.5 (3)  |
| O7—Eu1—O3 <sup>ii</sup>                 | 150.18 (18) | O5—C6—O6               | 119.3 (6) |
| O7—Eu1—O6                               | 127.27 (18) | C7—C6—Eu1              | 178.8 (5) |
| O7—Eu1—O5                               | 78.41 (16)  | C7—C6—O6               | 121.3 (6) |
| O7—Eu1—O2 <sup>i</sup>                  | 84.09 (19)  | C7—C6—O5               | 119.3 (6) |
| O4 <sup>ii</sup> —Eu1—O1                | 78.45 (16)  | H2a—C2—C1              | 109.6 (4) |
| O4 <sup>ii</sup> —Eu1—O1 <sup>i</sup>   | 72.87 (16)  | H2b—C2—C1              | 109.6 (4) |
| O4 <sup>ii</sup> —Eu1—O3 <sup>iii</sup> | 118.20 (15) | H2b—C2—H2a             | 108.1     |
| O4 <sup>ii</sup> —Eu1—O3 <sup>ii</sup>  | 51.50 (15)  | C3—C2—C1               | 110.4 (6) |
| O4 <sup>ii</sup> —Eu1—O6                | 76.10 (17)  | C3—C2—H2a              | 109.6 (4) |
| O4 <sup>ii</sup> —Eu1—O5                | 128.82 (17) | C3—C2—H2b              | 109.6 (4) |
| O4 <sup>ii</sup> —Eu1—O2 <sup>i</sup>   | 80.85 (19)  | H4a—C4—C5              | 108.6 (4) |
| O4 <sup>ii</sup> —Eu1—O7                | 143.85 (17) | H4b—C4—C5              | 108.6 (4) |
| C1 <sup>i</sup> —Eu1—O1                 | 92.13 (17)  | H4b—C4—H4a             | 107.6     |
| C1 <sup>i</sup> —Eu1—O1 <sup>i</sup>    | 25.95 (16)  | C3—C4—C5               | 114.6 (6) |
| C1 <sup>i</sup> —Eu1—O3 <sup>iii</sup>  | 98.84 (17)  | C3—C4—H4a              | 108.6 (4) |
| C1 <sup>i</sup> —Eu1—O3 <sup>ii</sup>   | 87.99 (17)  | C3—C4—H4b              | 108.6 (5) |
| C1 <sup>i</sup> —Eu1—O6                 | 150.30 (17) | H7c—C7—C6              | 109.0 (4) |

|                                         |             |                                         |             |
|-----------------------------------------|-------------|-----------------------------------------|-------------|
| C1 <sup>i</sup> —Eu1—O5                 | 156.24 (16) | H7d—C7—C6                               | 109.0 (4)   |
| C1 <sup>i</sup> —Eu1—O2 <sup>i</sup>    | 24.88 (17)  | H7d—C7—H7c                              | 107.8       |
| C1 <sup>i</sup> —Eu1—O7                 | 78.29 (18)  | C8—C7—C6                                | 112.9 (6)   |
| C1 <sup>i</sup> —Eu1—O4 <sup>ii</sup>   | 74.27 (18)  | C8—C7—H7c                               | 109.0 (3)   |
| C5 <sup>ii</sup> —Eu1—O1                | 103.09 (17) | C8—C7—H7d                               | 109.0 (3)   |
| C5 <sup>ii</sup> —Eu1—O1 <sup>i</sup>   | 89.14 (17)  | C7 <sup>iv</sup> —C8—C7                 | 110.9 (8)   |
| C5 <sup>ii</sup> —Eu1—O3 <sup>iii</sup> | 92.85 (17)  | H8a <sup>iv</sup> —C8—C7                | 109.5 (3)   |
| C5 <sup>ii</sup> —Eu1—O3 <sup>ii</sup>  | 25.90 (17)  | H8a—C8—C7                               | 109.5 (3)   |
| C5 <sup>ii</sup> —Eu1—O6                | 73.91 (17)  | H8a—C8—C7 <sup>iv</sup>                 | 109.5 (3)   |
| C5 <sup>ii</sup> —Eu1—O5                | 122.83 (17) | H8a <sup>iv</sup> —C8—C7 <sup>iv</sup>  | 109.5 (3)   |
| C5 <sup>ii</sup> —Eu1—O2 <sup>i</sup>   | 75.62 (19)  | H8a <sup>iv</sup> —C8—H8a               | 108.0       |
| C5 <sup>ii</sup> —Eu1—O7                | 158.43 (19) | H8b <sup>iv</sup> —C8—C7 <sup>iv</sup>  | 109.5 (3)   |
| C5 <sup>ii</sup> —Eu1—O4 <sup>ii</sup>  | 25.60 (17)  | H8b <sup>iv</sup> —C8—C7                | 109.5 (3)   |
| C5 <sup>ii</sup> —Eu1—C1 <sup>i</sup>   | 80.22 (18)  | H8b—C8—C7 <sup>iv</sup>                 | 109.5 (3)   |
| C6—Eu1—O1                               | 83.70 (17)  | H8b—C8—C7                               | 109.5 (3)   |
| C6—Eu1—O1 <sup>i</sup>                  | 150.02 (16) | H8b <sup>iv</sup> —C8—H8a               | 0.0         |
| C6—Eu1—O3 <sup>iii</sup>                | 85.83 (18)  | H8b—C8—H8a <sup>iv</sup>                | 0.0         |
| C6—Eu1—O3 <sup>ii</sup>                 | 92.54 (17)  | H8b <sup>iv</sup> —C8—H8a <sup>iv</sup> | 108.0       |
| C6—Eu1—O6                               | 26.24 (18)  | H8b—C8—H8a                              | 108.0       |
| C6—Eu1—O5                               | 26.64 (17)  | H8b—C8—H8b <sup>iv</sup>                | 108.0       |
| C6—Eu1—O2 <sup>i</sup>                  | 159.13 (17) | H8b <sup>iv</sup> —H8a—C8               | 0 (50000)   |
| C6—Eu1—O7                               | 103.38 (18) | H8a <sup>iv</sup> —H8b—C8 <sup>iv</sup> | 0 (2100000) |
| C6—Eu1—O4 <sup>ii</sup>                 | 102.30 (19) | C4—C3—C2                                | 113.2 (6)   |



|                          |             |            |           |
|--------------------------|-------------|------------|-----------|
| C6—Eu1—C1 <sup>i</sup>   | 175.11 (18) | H3a—C3—C2  | 108.9 (4) |
| C6—Eu1—C5 <sup>ii</sup>  | 98.19 (19)  | H3a—C3—C4  | 108.9 (5) |
| C1—O1—Eu1                | 155.8 (4)   | H3b—C3—C2  | 108.9 (4) |
| C1—O1—Eu1 <sup>i</sup>   | 89.7 (4)    | H3b—C3—C4  | 108.9 (4) |
| C5—O3—Eu1 <sup>iii</sup> | 153.7 (4)   | H3b—C3—H3a | 107.8     |

Symmetry code(s): (i)  $-x+1, -y+1, -z+1$ ; (ii)  $x+1/2, y-1/2, z$ ; (iii)  $-x+3/2, -y+3/2, -z+1$ ; (iv)  $-x+2, y, -z+3/2$ ; (v)  $x-1/2, y+1/2, z$ .

**Table S9.** Selected Hydrogen bonding geometries for CP 3.

| $D-H\cdots A$                   | $D-H$ (Å) | $H\cdots A$ (Å) | $D\cdots A$ (Å) | $D-H\cdots A$ (°) |
|---------------------------------|-----------|-----------------|-----------------|-------------------|
| O7—H7b $\cdots$ O5 <sup>i</sup> | 0.8612    | 2.04 (4)        | 2.690 (7)       | 131 (4)           |

Symmetry code(s): (i)  $-x+3/2, -y+3/2, -z+1$ .

**Table S10.** Selected Bond lengths (Å) for CP 4.

|                       |           |        |            |
|-----------------------|-----------|--------|------------|
| Gd1—O1 <sup>i</sup>   | 2.385 (6) | C4—C3  | 1.504 (14) |
| Gd1—O1                | 2.649 (6) | C6—C7  | 1.516 (12) |
| Gd1—O2                | 2.426 (7) | C7—C8  | 1.513 (11) |
| Gd1—O5                | 2.465 (6) | C2—C3  | 1.541 (13) |
| Gd1—O7                | 2.381 (6) | O7—H7B | 0.8574     |
| Gd1—O3 <sup>ii</sup>  | 2.541 (6) | O7—H7A | 0.8572     |
| Gd1—O3 <sup>iii</sup> | 2.390 (6) | O8—H8D | 0.8503     |
| Gd1—O6                | 2.426 (7) | O8—H8C | 0.8489     |
| Gd1—O4 <sup>ii</sup>  | 2.460 (6) | O9—H9B | 0.8512     |
| Gd1—C5 <sup>ii</sup>  | 2.884 (8) | O9—H9A | 0.8496     |
| Gd1—C1                | 2.920 (9) | C2—H2B | 0.9700     |
| Gd1—C6                | 2.822 (9) | C2—H2A | 0.9700     |

|       |            |        |        |
|-------|------------|--------|--------|
| O1—C1 | 1.278 (10) | C3—H3B | 0.9700 |
| O2—C1 | 1.249 (11) | C3—H3A | 0.9700 |
| O5—C6 | 1.273 (11) | C4—H4B | 0.9700 |
| O3—C5 | 1.255 (10) | C4—H4A | 0.9700 |
| O6—C6 | 1.257 (11) | C7—H7D | 0.9700 |
| O4—C5 | 1.261 (10) | C7—H7C | 0.9700 |
| C5—C4 | 1.495 (12) | C8—H8B | 0.9700 |
| C1—C2 | 1.491 (12) | C8—H8A | 0.9700 |

Symmetry code(s): (i)  $-x+1, -y+1, -z+1$ ; (ii)  $-x+3/2, -y+1/2, -z+1$ ; (iii)  $x+1/2, y+1/2, z$ .

**Table S11.** Selected Bond angles ( $^{\circ}$ ) for CP 4.

|                                        |           |                                         |           |
|----------------------------------------|-----------|-----------------------------------------|-----------|
| O1 <sup>i</sup> —Gd1—O1                | 66.6 (2)  | C6—Gd1—C1                               | 174.9 (2) |
| O1 <sup>i</sup> —Gd1—O2                | 117.3 (2) | Gd1 <sup>i</sup> —O1—Gd1                | 113.4 (2) |
| O1 <sup>i</sup> —Gd1—O5                | 87.9 (2)  | C1—O1—Gd1                               | 88.9 (5)  |
| O1 <sup>i</sup> —Gd1—O3 <sup>ii</sup>  | 127.5 (2) | C1—O1—Gd1 <sup>i</sup>                  | 156.6 (6) |
| O1 <sup>i</sup> —Gd1—O3 <sup>iii</sup> | 162.0 (2) | C1—O2—Gd1                               | 100.3 (5) |
| O1 <sup>i</sup> —Gd1—O6                | 79.8 (2)  | C6—O5—Gd1                               | 92.4 (5)  |
| O1 <sup>i</sup> —Gd1—O4 <sup>ii</sup>  | 78.2 (2)  | Gd1—O7—H7A                              | 110.0     |
| O1—Gd1—C5 <sup>ii</sup>                | 89.2 (2)  | Gd1—O7—H7B                              | 109.5     |
| O1 <sup>i</sup> —Gd1—C5 <sup>ii</sup>  | 103.0 (2) | H7A—O7—H7B                              | 109.1     |
| O1 <sup>i</sup> —Gd1—C1                | 92.4 (2)  | Gd1 <sup>iv</sup> —O3—Gd1 <sup>ii</sup> | 112.8 (2) |
| O1—Gd1—C1                              | 25.9 (2)  | C5—O3—Gd1 <sup>iv</sup>                 | 153.4 (6) |
| O1—Gd1—C6                              | 149.9 (2) | C5—O3—Gd1 <sup>ii</sup>                 | 92.6 (5)  |

|                          |           |                         |           |
|--------------------------|-----------|-------------------------|-----------|
| O1 <sup>i</sup> —Gd1—C6  | 83.3 (2)  | C6—O6—Gd1               | 94.7 (6)  |
| O2—Gd1—O1                | 50.7 (2)  | C5—O4—Gd1 <sup>ii</sup> | 96.2 (5)  |
| O2—Gd1—O5                | 146.0 (2) | O3—C5—Gd1 <sup>ii</sup> | 61.7 (4)  |
| O2—Gd1—O3 <sup>ii</sup>  | 73.1 (2)  | O3—C5—O4                | 119.7 (8) |
| O2—Gd1—O6                | 147.9 (2) | O3—C5—C4                | 119.2 (8) |
| O2—Gd1—O4 <sup>ii</sup>  | 80.9 (2)  | O4—C5—Gd1 <sup>ii</sup> | 58.0 (4)  |
| O2—Gd1—C5 <sup>ii</sup>  | 75.5 (2)  | O4—C5—C4                | 121.1 (8) |
| O2—Gd1—C1                | 24.9 (2)  | C4—C5—Gd1 <sup>ii</sup> | 178.9 (7) |
| O2—Gd1—C6                | 159.4 (2) | O1—C1—Gd1               | 65.1 (5)  |
| O5—Gd1—O1                | 143.3 (2) | O1—C1—C2                | 121.2 (8) |
| O5—Gd1—O3 <sup>ii</sup>  | 110.9 (2) | O2—C1—Gd1               | 54.8 (5)  |
| O5—Gd1—C5 <sup>ii</sup>  | 123.3 (2) | O2—C1—O1                | 119.5 (8) |
| O5—Gd1—C1                | 156.2 (2) | O2—C1—C2                | 119.3 (8) |
| O5—Gd1—C6                | 26.8 (2)  | C2—C1—Gd1               | 170.9 (6) |
| O7—Gd1—O1                | 71.9 (2)  | C5—C4—H4A               | 108.5     |
| O7—Gd1—O1 <sup>i</sup>   | 80.0 (2)  | C5—C4—H4B               | 108.5     |
| O7—Gd1—O2                | 83.8 (2)  | C5—C4—C3                | 115.1 (8) |
| O7—Gd1—O5                | 78.2 (2)  | H4A—C4—H4B              | 107.5     |
| O7—Gd1—O3 <sup>iii</sup> | 88.7 (2)  | C3—C4—H4A               | 108.5     |
| O7—Gd1—O3 <sup>ii</sup>  | 150.0 (2) | C3—C4—H4B               | 108.5     |
| O7—Gd1—O6                | 127.5 (2) | O5—C6—Gd1               | 60.8 (5)  |
| O7—Gd1—O4 <sup>ii</sup>  | 143.7 (2) | O5—C6—C7                | 119.2 (8) |
| O7—Gd1—C5 <sup>ii</sup>  | 158.1 (2) | O6—C6—Gd1               | 58.9 (5)  |

|                                         |           |                         |            |
|-----------------------------------------|-----------|-------------------------|------------|
| O7—Gd1—C1                               | 78.4 (2)  | O6—C6—O5                | 119.7 (8)  |
| O7—Gd1—C6                               | 103.4 (2) | O6—C6—C7                | 121.0 (8)  |
| O3 <sup>ii</sup> —Gd1—O1                | 105.6 (2) | C7—C6—Gd1               | 179.1 (6)  |
| O3 <sup>iii</sup> —Gd1—O1               | 123.1 (2) | C6—C7—H7C               | 108.9      |
| O3 <sup>iii</sup> —Gd1—O2               | 74.9 (2)  | C6—C7—H7D               | 108.9      |
| O3 <sup>iii</sup> —Gd1—O5               | 76.1 (2)  | H7C—C7—H7D              | 107.7      |
| O3 <sup>iii</sup> —Gd1—O3 <sup>ii</sup> | 67.2 (2)  | C8—C7—C6                | 113.5 (8)  |
| O3 <sup>iii</sup> —Gd1—O6               | 96.5 (2)  | C8—C7—H7C               | 108.9      |
| O3 <sup>iii</sup> —Gd1—O4 <sup>ii</sup> | 118.3 (2) | C8—C7—H7D               | 108.9      |
| O3 <sup>iii</sup> —Gd1—C5 <sup>ii</sup> | 92.7 (2)  | C7—C8—C7 <sup>v</sup>   | 111.8 (11) |
| O3 <sup>ii</sup> —Gd1—C5 <sup>ii</sup>  | 25.8 (2)  | C7—C8—H8A               | 109.3      |
| O3 <sup>ii</sup> —Gd1—C1                | 87.7 (2)  | C7 <sup>v</sup> —C8—H8A | 109.3      |
| O3 <sup>iii</sup> —Gd1—C1               | 99.1 (2)  | C7—C8—H8B               | 109.3      |
| O3 <sup>ii</sup> —Gd1—C6                | 92.9 (2)  | C7 <sup>v</sup> —C8—H8B | 109.3      |
| O3 <sup>iii</sup> —Gd1—C6               | 85.8 (2)  | H8A—C8—H8B              | 107.9      |
| O6—Gd1—O1                               | 138.0 (2) | C1—C2—H2A               | 109.8      |
| O6—Gd1—O5                               | 53.1 (2)  | C1—C2—H2B               | 109.8      |
| O6—Gd1—O3 <sup>ii</sup>                 | 75.0 (2)  | C1—C2—C3                | 109.6 (8)  |
| O6—Gd1—O4 <sup>ii</sup>                 | 76.2 (2)  | H2A—C2—H2B              | 108.2      |
| O6—Gd1—C5 <sup>ii</sup>                 | 74.0 (2)  | C3—C2—H2A               | 109.8      |
| O6—Gd1—C1                               | 150.1 (2) | C3—C2—H2B               | 109.8      |
| O6—Gd1—C6                               | 26.3 (2)  | C4—C3—C2                | 113.6 (8)  |
| O4 <sup>ii</sup> —Gd1—O1                | 72.9 (2)  | C4—C3—H3A               | 108.8      |

|                                        |            |            |       |
|----------------------------------------|------------|------------|-------|
| O4 <sup>ii</sup> —Gd1—O5               | 129.1 (2)  | C4—C3—H3B  | 108.8 |
| O4 <sup>ii</sup> —Gd1—O3 <sup>ii</sup> | 51.53 (19) | C2—C3—H3A  | 108.8 |
| O4 <sup>ii</sup> —Gd1—C5 <sup>ii</sup> | 25.8 (2)   | C2—C3—H3B  | 108.8 |
| O4 <sup>ii</sup> —Gd1—C1               | 74.0 (2)   | H3A—C3—H3B | 107.7 |
| O4 <sup>ii</sup> —Gd1—C6               | 102.5 (2)  | H8C—O8—H8D | 109.5 |
| C5 <sup>ii</sup> —Gd1—C1               | 79.9 (2)   | H9A—O9—H9B | 109.4 |
| C6—Gd1—C5 <sup>ii</sup>                | 98.5 (2)   |            |       |

Symmetry code(s): (i)  $-x+1, -y+1, -z+1$ ; (ii)  $-x+3/2, -y+1/2, -z+1$ ; (iii)  $x+1/2, y+1/2, z$ ; (iv)  $x-1/2, y-1/2, z$ ; (v)  $-x+2, y, -z+3/2$ .

**Table S12.** Selected Hydrogen bonding geometries for CP 4.

| <i>D</i> —H... <i>A</i>  | <i>D</i> —H (Å) | H... <i>A</i> (Å) | <i>D</i> ... <i>A</i> (Å) | <i>D</i> —H... <i>A</i> (°) |
|--------------------------|-----------------|-------------------|---------------------------|-----------------------------|
| O7—H7B...O5 <sup>i</sup> | 0.86            | 1.95              | 2.694 (9)                 | 143.6                       |
| O8—H8C...O9              | 0.85            | 2.08              | 2.67 (4)                  | 125.3                       |
| O9—H9B...O8              | 0.85            | 1.89              | 2.67 (4)                  | 151.3                       |

Symmetry code(s): (i)  $-x+3/2, -y+3/2, -z+1$ .

**Table S13.** Selected Bond lengths (Å) for CP 5.

|                      |            |                       |            |
|----------------------|------------|-----------------------|------------|
| Dy1—Dy2 <sup>i</sup> | 3.9970 (4) | Dy2—Dy2 <sup>iv</sup> | 3.9693 (5) |
| Dy1—O1               | 2.564 (3)  | Dy2—O1 <sup>v</sup>   | 2.695 (3)  |
| Dy1—O1W              | 2.468 (3)  | Dy2—O2 <sup>v</sup>   | 2.531 (4)  |
| Dy1—O5               | 2.413 (3)  | Dy2—O3                | 2.451 (3)  |
| Dy1—O6 <sup>ii</sup> | 2.506 (4)  | Dy2—O4 <sup>iv</sup>  | 2.446 (3)  |
| Dy1—O7 <sup>i</sup>  | 2.530 (4)  | Dy2—O8                | 2.434 (3)  |
| Dy1—O8 <sup>i</sup>  | 2.657 (3)  | Dy2—O9 <sup>iv</sup>  | 2.562 (3)  |

|                        |           |                       |           |
|------------------------|-----------|-----------------------|-----------|
| Dy1—O11 <sup>iii</sup> | 2.579 (3) | Dy2—O9                | 2.483 (3) |
| Dy1—O12 <sup>iii</sup> | 2.677 (3) | Dy2—O10 <sup>iv</sup> | 2.567 (3) |
| Dy1—O13                | 2.484 (3) | Dy2—O12 <sup>vi</sup> | 2.473 (3) |

Symmetry code(s): (i)  $x, -y+1/2, z+1/2$ ; (ii)  $-x, -y+1, -z+1$ ; (iii)  $-x+1, -y+1, -z+1$ ; (iv)  $-x+1, -y, -z+1$ ; (v)  $x, -y+1/2, z-1/2$ ; (vi)  $-x+1, y-1/2, -z+1/2$ .

**Table S14.** Selected Bond angles (°) for CP 5.

|                            |             |                                         |             |
|----------------------------|-------------|-----------------------------------------|-------------|
| O1—Dy1—O8 <sup>i</sup>     | 67.45 (10)  | O13—Dy1—O11 <sup>iii</sup>              | 138.23 (13) |
| O1—Dy1—O11 <sup>iii</sup>  | 72.08 (10)  | O13—Dy1—O12 <sup>iii</sup>              | 126.55 (11) |
| O1—Dy1—O12 <sup>iii</sup>  | 64.67 (9)   | O2 <sup>v</sup> —Dy2—O1 <sup>v</sup>    | 49.49 (10)  |
| O1W—Dy1—O1                 | 144.33 (14) | O2 <sup>v</sup> —Dy2—O9 <sup>iv</sup>   | 151.73 (11) |
| O1W—Dy1—O6 <sup>ii</sup>   | 83.02 (15)  | O2 <sup>v</sup> —Dy2—O10 <sup>iv</sup>  | 141.05 (12) |
| O1W—Dy1—O7 <sup>i</sup>    | 68.51 (13)  | O3—Dy2—O1 <sup>v</sup>                  | 84.00 (10)  |
| O1W—Dy1—O8 <sup>i</sup>    | 112.93 (11) | O3—Dy2—O2 <sup>v</sup>                  | 104.80 (13) |
| O1W—Dy1—O11 <sup>iii</sup> | 131.97 (11) | O3—Dy2—O9                               | 70.21 (11)  |
| O1W—Dy1—O12 <sup>iii</sup> | 149.75 (13) | O3—Dy2—O9 <sup>iv</sup>                 | 75.08 (10)  |
| O1W—Dy1—O13                | 74.71 (15)  | O3—Dy2—O10 <sup>iv</sup>                | 114.02 (12) |
| O5—Dy1—C10 <sup>i</sup>    | 159.32 (11) | O3—Dy2—O12 <sup>vi</sup>                | 139.48 (10) |
| O5—Dy1—C15 <sup>iii</sup>  | 98.19 (11)  | O4 <sup>iv</sup> —Dy2—O1 <sup>v</sup>   | 128.06 (10) |
| O5—Dy1—Dy2 <sup>i</sup>    | 128.65 (10) | O4 <sup>iv</sup> —Dy2—O2 <sup>v</sup>   | 83.57 (12)  |
| O5—Dy1—O1                  | 88.76 (12)  | O4 <sup>iv</sup> —Dy2—O3                | 135.82 (11) |
| O5—Dy1—O1W                 | 76.83 (13)  | O4 <sup>iv</sup> —Dy2—O9 <sup>iv</sup>  | 78.18 (10)  |
| O5—Dy1—O6 <sup>ii</sup>    | 109.06 (12) | O4 <sup>iv</sup> —Dy2—O9                | 69.66 (10)  |
| O5—Dy1—O7 <sup>i</sup>     | 144.82 (13) | O4 <sup>iv</sup> —Dy2—O10 <sup>iv</sup> | 71.08 (12)  |

|                                            |             |                                          |             |
|--------------------------------------------|-------------|------------------------------------------|-------------|
| O5—Dy1—O8 <sup>i</sup>                     | 151.25 (12) | O4 <sup>iv</sup> —Dy2—O12 <sup>vi</sup>  | 84.69 (10)  |
| O5—Dy1—O11 <sup>iii</sup>                  | 74.32 (11)  | O8—Dy2—O1 <sup>v</sup>                   | 68.63 (10)  |
| O5—Dy1—O12 <sup>iii</sup>                  | 121.89 (11) | O8—Dy2—O2 <sup>v</sup>                   | 117.22 (11) |
| O5—Dy1—O13                                 | 84.95 (13)  | O8—Dy2—O3                                | 74.86 (12)  |
| O6 <sup>ii</sup> —Dy1—O1                   | 132.66 (11) | O8—Dy2—O4 <sup>iv</sup>                  | 139.92 (12) |
| O6 <sup>ii</sup> —Dy1—O7 <sup>i</sup>      | 73.12 (14)  | O8—Dy2—O9 <sup>iv</sup>                  | 90.36 (10)  |
| O6 <sup>ii</sup> —Dy1—O8 <sup>i</sup>      | 99.15 (11)  | O8—Dy2—O9                                | 144.72 (10) |
| O6 <sup>ii</sup> —Dy1—O11 <sup>iii</sup>   | 71.45 (12)  | O8—Dy2—O10 <sup>iv</sup>                 | 72.17 (11)  |
| O6 <sup>ii</sup> —Dy1—O12 <sup>iii</sup>   | 68.79 (10)  | O8—Dy2—O12 <sup>vi</sup>                 | 69.57 (10)  |
| O7 <sup>i</sup> —Dy1—O1                    | 116.15 (11) | O9 <sup>iv</sup> —Dy2—O1 <sup>v</sup>    | 153.73 (9)  |
| O7 <sup>i</sup> —Dy1—O8 <sup>i</sup>       | 49.52 (11)  | O9—Dy2—O1 <sup>v</sup>                   | 111.61 (10) |
| O7 <sup>i</sup> —Dy1—O11 <sup>iii</sup>    | 134.91 (13) | O9—Dy2—O2 <sup>v</sup>                   | 77.24 (11)  |
| O7 <sup>i</sup> —Dy1—O12 <sup>iii</sup>    | 92.18 (12)  | O9—Dy2—O9 <sup>iv</sup>                  | 76.25 (11)  |
| O8 <sup>i</sup> —Dy1—O12 <sup>iii</sup>    | 63.34 (9)   | O9—Dy2—O10 <sup>iv</sup>                 | 118.17 (10) |
| O11 <sup>iii</sup> —Dy1—C10 <sup>i</sup>   | 125.49 (10) | O9 <sup>iv</sup> —Dy2—O10 <sup>iv</sup>  | 50.19 (9)   |
| O11 <sup>iii</sup> —Dy1—O8 <sup>i</sup>    | 110.86 (9)  | O10 <sup>iv</sup> —Dy2—O1 <sup>v</sup>   | 130.17 (10) |
| O11 <sup>iii</sup> —Dy1—O12 <sup>iii</sup> | 49.15 (9)   | O12 <sup>vi</sup> —Dy2—O1 <sup>v</sup>   | 65.58 (9)   |
| O13—Dy1—O1                                 | 71.60 (12)  | O12 <sup>vi</sup> —Dy2—O2 <sup>v</sup>   | 75.96 (11)  |
| O13—Dy1—O6 <sup>ii</sup>                   | 150.32 (14) | O12 <sup>vi</sup> —Dy2—O9                | 144.60 (9)  |
| O13—Dy1—O7 <sup>i</sup>                    | 80.51 (15)  | O12 <sup>vi</sup> —Dy2—O9 <sup>iv</sup>  | 122.95 (9)  |
| O13—Dy1—O8 <sup>i</sup>                    | 72.66 (12)  | O12 <sup>vi</sup> —Dy2—O10 <sup>iv</sup> | 72.76 (9)   |

---

Symmetry code(s): (i)  $x, -y+1/2, z+1/2$ ; (ii)  $-x, -y+1, -z+1$ ; (iii)  $-x+1, -y+1, -z+1$ ; (iv)  $-x+1, -y, -z+1$ ; (v)  $x, -y+1/2, z-1/2$ ; (vi)  $-x+1, y-1/2, -z+1/2$ .

**Table S15.** Selected Hydrogen bonding geometries for CP 5.

| D       | H                | A | d(D-H)/Å | d(H-A)/Å | d(D-A)/Å | D-H-A/° |
|---------|------------------|---|----------|----------|----------|---------|
| O1WH1WA | O11 <sup>1</sup> |   | 0.85     | 1.87     | 2.715(5) | 169.9   |

Symmetry code(s): <sup>1</sup>-1+X,+Y,+Z**Table S16.** Selected Bond lengths (Å) for CP 6.

|                       |             |                       |             |
|-----------------------|-------------|-----------------------|-------------|
| O1—Pr1                | 2.4727 (17) | O7—Pr2                | 2.416 (2)   |
| O1—Pr2 <sup>i</sup>   | 2.6775 (18) | O8—Pr2 <sup>iv</sup>  | 2.499 (2)   |
| O2—Pr2 <sup>i</sup>   | 2.5768 (19) | O9—Pr1                | 2.445 (2)   |
| O1W—Pr2               | 2.467 (2)   | O10—Pr1 <sup>v</sup>  | 2.441 (2)   |
| O3—Pr1 <sup>ii</sup>  | 2.479 (2)   | O11—Pr1 <sup>vi</sup> | 2.698 (2)   |
| O3—Pr1 <sup>iii</sup> | 2.566 (2)   | O11—Pr2               | 2.556 (2)   |
| O4—Pr1 <sup>iii</sup> | 2.568 (2)   | O12—Pr1 <sup>vi</sup> | 2.528 (2)   |
| O5—Pr1                | 2.438 (2)   | O13—Pr2               | 2.480 (2)   |
| O5—Pr2 <sup>i</sup>   | 2.660 (2)   | Pr1—Pr1 <sup>v</sup>  | 3.9725 (13) |
| O6—Pr2 <sup>i</sup>   | 2.528 (2)   |                       |             |

Symmetry code(s): (i)  $x, -y+3/2, z+1/2$ ; (ii)  $-x, y-1/2, -z+3/2$ ; (iii)  $x, -y+1/2, z+1/2$ ; (iv)  $-x+1, -y+2, -z+1$ ; (v)  $-x, -y+1, -z+1$ ; (vi)  $x, -y+3/2, z-1/2$ .**Table S17.** Selected Bond angles (°) for CP 6.

|                           |            |                                        |            |
|---------------------------|------------|----------------------------------------|------------|
| O1—Pr1—O3 <sup>vii</sup>  | 123.06 (6) | O12 <sup>i</sup> —Pr1—Pr1 <sup>v</sup> | 115.58 (6) |
| O1—Pr1—O3 <sup>viii</sup> | 144.59 (6) | O2 <sup>vi</sup> —Pr2—O1 <sup>vi</sup> | 49.30 (6)  |
| O1—Pr1—O4 <sup>vii</sup>  | 72.66 (6)  | O2 <sup>vi</sup> —Pr2—O5 <sup>vi</sup> | 111.02 (6) |
| O1—Pr1—O11 <sup>i</sup>   | 65.47 (6)  | O1W—Pr2—O1 <sup>vi</sup>               | 149.25 (8) |
| O1—Pr1—O12 <sup>i</sup>   | 75.91 (7)  | O1W—Pr2—O2 <sup>vi</sup>               | 131.64 (7) |



|                                           |            |                                        |            |
|-------------------------------------------|------------|----------------------------------------|------------|
| O1—Pr1—Pr1 <sup>v</sup>                   | 149.42 (4) | O1W—Pr2—O5 <sup>vi</sup>               | 112.91 (7) |
| O3 <sup>viii</sup> —Pr1—O3 <sup>vii</sup> | 76.12 (7)  | O1W—Pr2—O6 <sup>vi</sup>               | 68.62 (8)  |
| O3 <sup>vii</sup> —Pr1—O4 <sup>vii</sup>  | 50.40 (6)  | O1W—Pr2—O8 <sup>iv</sup>               | 82.65 (9)  |
| O3 <sup>viii</sup> —Pr1—O4 <sup>vii</sup> | 118.04 (6) | O1W—Pr2—O11                            | 144.81 (8) |
| O3 <sup>vii</sup> —Pr1—O11 <sup>i</sup>   | 153.68 (6) | O1W—Pr2—O13                            | 75.10 (9)  |
| O3 <sup>viii</sup> —Pr1—O11 <sup>i</sup>  | 111.80 (6) | O5 <sup>vi</sup> —Pr2—O1 <sup>vi</sup> | 63.35 (6)  |
| O3 <sup>viii</sup> —Pr1—O12 <sup>i</sup>  | 77.32 (7)  | O6 <sup>vi</sup> —Pr2—O1 <sup>vi</sup> | 91.90 (8)  |
| O4 <sup>vii</sup> —Pr1—O11 <sup>i</sup>   | 130.09 (6) | O6 <sup>vi</sup> —Pr2—O2 <sup>vi</sup> | 134.85 (8) |
| O4 <sup>vii</sup> —Pr1—Pr1 <sup>v</sup>   | 83.20 (5)  | O6 <sup>vi</sup> —Pr2—O5 <sup>vi</sup> | 49.23 (7)  |
| O5—Pr1—O1                                 | 69.60 (7)  | O6 <sup>vi</sup> —Pr2—O11              | 115.96 (7) |
| O5—Pr1—O3 <sup>viii</sup>                 | 144.73 (7) | O7—Pr2—O1 <sup>vi</sup>                | 121.97 (7) |
| O5—Pr1—O3 <sup>vii</sup>                  | 90.39 (6)  | O7—Pr2—O2 <sup>vi</sup>                | 74.22 (7)  |
| O5—Pr1—O4 <sup>vii</sup>                  | 72.39 (7)  | O7—Pr2—O1W                             | 76.94 (8)  |
| O5—Pr1—O9                                 | 74.82 (7)  | O7—Pr2—O5 <sup>vi</sup>                | 151.38 (8) |
| O5—Pr1—O10 <sup>v</sup>                   | 140.07 (7) | O7—Pr2—O6 <sup>vi</sup>                | 145.01 (8) |
| O5—Pr1—O11 <sup>i</sup>                   | 68.54 (6)  | O7—Pr2—O8 <sup>iv</sup>                | 108.98 (7) |
| O5—Pr1—O12 <sup>i</sup>                   | 117.21 (7) | O7—Pr2—O11                             | 88.85 (7)  |
| O9—Pr1—O1                                 | 139.53 (6) | O7—Pr2—O13                             | 84.95 (8)  |
| O9—Pr1—O3 <sup>viii</sup>                 | 70.26 (7)  | O7—Pr2—Pr1 <sup>vi</sup>               | 128.75 (6) |
| O9—Pr1—O3 <sup>vii</sup>                  | 74.88 (6)  | O8 <sup>iv</sup> —Pr2—O1 <sup>vi</sup> | 68.66 (7)  |
| O9—Pr1—O4 <sup>vii</sup>                  | 114.15 (7) | O8 <sup>iv</sup> —Pr2—O2 <sup>vi</sup> | 71.38 (8)  |
| O9—Pr1—O11 <sup>i</sup>                   | 84.16 (7)  | O8 <sup>iv</sup> —Pr2—O5 <sup>vi</sup> | 99.11 (7)  |
| O9—Pr1—O12 <sup>i</sup>                   | 104.97 (8) | O8 <sup>iv</sup> —Pr2—O6 <sup>vi</sup> | 73.19 (8)  |

|                                          |            |                           |            |
|------------------------------------------|------------|---------------------------|------------|
| O10 <sup>v</sup> —Pr1—O1                 | 84.79 (6)  | O8 <sup>iv</sup> —Pr2—O11 | 132.54 (7) |
| O10 <sup>v</sup> —Pr1—O3 <sup>vii</sup>  | 78.22 (6)  | O11—Pr2—O1 <sup>vi</sup>  | 64.71 (6)  |
| O10 <sup>v</sup> —Pr1—O3 <sup>viii</sup> | 69.47 (6)  | O11—Pr2—O2 <sup>vi</sup>  | 72.11 (7)  |
| O10 <sup>v</sup> —Pr1—O4 <sup>vii</sup>  | 70.95 (8)  | O11—Pr2—O5 <sup>vi</sup>  | 67.52 (6)  |
| O10 <sup>v</sup> —Pr1—O9                 | 135.67 (7) | O13—Pr2—O1 <sup>vi</sup>  | 126.63 (7) |
| O10 <sup>v</sup> —Pr1—O11 <sup>i</sup>   | 128.06 (6) | O13—Pr2—O2 <sup>vi</sup>  | 138.22 (8) |
| O10 <sup>v</sup> —Pr1—O12 <sup>i</sup>   | 83.48 (7)  | O13—Pr2—O5 <sup>vi</sup>  | 72.71 (7)  |
| O12 <sup>i</sup> —Pr1—O3 <sup>vii</sup>  | 151.69 (6) | O13—Pr2—O6 <sup>vi</sup>  | 80.58 (9)  |
| O12 <sup>i</sup> —Pr1—O4 <sup>vii</sup>  | 140.77 (7) | O13—Pr2—O8 <sup>iv</sup>  | 150.40 (9) |
| O12 <sup>i</sup> —Pr1—O11 <sup>i</sup>   | 49.57 (7)  | O13—Pr2—O11               | 71.66 (8)  |

Symmetry code(s): (i)  $x, -y+3/2, z+1/2$ ; (ii)  $-x, y-1/2, -z+3/2$ ; (iii)  $x, -y+1/2, z+1/2$ ; (iv)  $-x+1, -y+2, -z+1$ ; (v)  $-x, -y+1, -z+1$ ; (vi)  $x, -y+3/2, z-1/2$ ; (vii)  $x, -y+1/2, z-1/2$ ; (viii)  $-x, y+1/2, -z+3/2$ .

**Table S18.** Selected Hydrogen bonding geometries for CP 6.

| D       | H               | A | d(D-H)/Å | d(H-A)/Å | d(D-A)/Å | D-H-A/° |
|---------|-----------------|---|----------|----------|----------|---------|
| O1WH1WA | O2W             |   | 0.88     | 1.84     | 2.694(4) | 164.1   |
| O1WH1WB | O2 <sup>1</sup> |   | 0.88     | 1.88     | 2.720(3) | 159.8   |
| O2WH2WA | O4 <sup>1</sup> |   | 0.85     | 1.96     | 2.797(4) | 167.9   |

Symmetry code(s): <sup>1</sup>1-X,1/2+Y,3/2-Z

**Table S19.** Selected Bond lengths (Å) for CP 7.

|                     |           |         |           |
|---------------------|-----------|---------|-----------|
| O1—Eu1              | 2.392 (7) | O4W—Eu2 | 2.389 (7) |
| O1—Eu2 <sup>i</sup> | 2.586 (8) | O6—Eu1  | 2.457 (9) |
| O2—Eu2 <sup>i</sup> | 2.485 (9) | O7—Eu2  | 2.446 (8) |
| O1W—Eu1             | 2.371 (9) | O8—Eu2  | 2.424 (8) |

|                      |           |                        |           |
|----------------------|-----------|------------------------|-----------|
| O3—Eu1 <sup>ii</sup> | 2.538 (9) | O9—Eu1 <sup>iii</sup>  | 2.583 (8) |
| O2W—Eu1              | 2.379 (7) | O9—Eu2                 | 2.382 (7) |
| O4—Eu1 <sup>ii</sup> | 2.444 (8) | O10—Eu1 <sup>iii</sup> | 2.487 (9) |
| O3W—Eu2              | 2.380 (9) | O11—Eu2 <sup>ii</sup>  | 2.517 (8) |
| O5—Eu1               | 2.477 (8) | O12—Eu2 <sup>ii</sup>  | 2.464 (8) |

Symmetry code(s): (i)  $-x+3/2, -y+1, z+1/2$ ; (ii)  $x-1, y, z$ ; (iii)  $-x+3/2, -y+1, z-1/2$ .

**Table S20.** Selected Bond angles (°) for CP 7.

|                                       |           |                           |           |
|---------------------------------------|-----------|---------------------------|-----------|
| O1—Eu1—O3 <sup>iv</sup>               | 126.4 (3) | O3W—Eu2—O1 <sup>iii</sup> | 73.3 (3)  |
| O1—Eu1—O4 <sup>iv</sup>               | 75.4 (3)  | O3W—Eu2—O2 <sup>iii</sup> | 77.8 (3)  |
| O1—Eu1—O5                             | 80.6 (3)  | O3W—Eu2—O4W               | 80.8 (3)  |
| O1—Eu1—O6                             | 93.1 (3)  | O3W—Eu2—O7                | 128.6 (3) |
| O1—Eu1—O9 <sup>i</sup>                | 67.5 (2)  | O3W—Eu2—O8                | 75.3 (3)  |
| O1—Eu1—O10 <sup>i</sup>               | 118.1 (3) | O3W—Eu2—O9                | 79.3 (3)  |
| O1W—Eu1—O1                            | 78.7 (3)  | O3W—Eu2—O11 <sup>iv</sup> | 146.0 (3) |
| O1W—Eu1—O3 <sup>iv</sup>              | 147.2 (4) | O3W—Eu2—O12 <sup>iv</sup> | 145.2 (3) |
| O1W—Eu1—O2W                           | 81.0 (3)  | O4W—Eu2—O1 <sup>iii</sup> | 125.7 (3) |
| O1W—Eu1—O4 <sup>iv</sup>              | 144.8 (3) | O4W—Eu2—O2 <sup>iii</sup> | 78.0 (3)  |
| O1W—Eu1—O5                            | 76.2 (3)  | O4W—Eu2—O7                | 82.4 (3)  |
| O1W—Eu1—O6                            | 129.4 (3) | O4W—Eu2—O8                | 73.2 (3)  |
| O1W—Eu1—O9 <sup>i</sup>               | 73.7 (3)  | O4W—Eu2—O11 <sup>iv</sup> | 80.5 (3)  |
| O1W—Eu1—O10 <sup>i</sup>              | 78.0 (3)  | O4W—Eu2—O12 <sup>iv</sup> | 131.5 (3) |
| O3 <sup>iv</sup> —Eu1—O9 <sup>i</sup> | 95.5 (3)  | O7—Eu2—O1 <sup>iii</sup>  | 149.5 (3) |

|                                          |           |                                          |           |
|------------------------------------------|-----------|------------------------------------------|-----------|
| O2W—Eu1—O1                               | 150.6 (3) | O7—Eu2—O2 <sup>iii</sup>                 | 143.9 (3) |
| O2W—Eu1—O3 <sup>iv</sup>                 | 81.1 (3)  | O7—Eu2—O11 <sup>iv</sup>                 | 76.4 (3)  |
| O2W—Eu1—O4 <sup>iv</sup>                 | 131.0 (3) | O7—Eu2—O12 <sup>iv</sup>                 | 75.9 (3)  |
| O2W—Eu1—O5                               | 73.9 (3)  | O8—Eu2—O1 <sup>iii</sup>                 | 139.1 (3) |
| O2W—Eu1—O6                               | 83.5 (4)  | O8—Eu2—O2 <sup>iii</sup>                 | 143.0 (3) |
| O2W—Eu1—O9 <sup>i</sup>                  | 126.1 (3) | O8—Eu2—O7                                | 53.3 (3)  |
| O2W—Eu1—O10 <sup>i</sup>                 | 77.7 (3)  | O8—Eu2—O11 <sup>iv</sup>                 | 125.1 (3) |
| O4 <sup>iv</sup> —Eu1—O3 <sup>iv</sup>   | 51.0 (3)  | O8—Eu2—O12 <sup>iv</sup>                 | 121.4 (3) |
| O4 <sup>iv</sup> —Eu1—O5                 | 121.7 (3) | O9—Eu2—O1 <sup>iii</sup>                 | 67.6 (2)  |
| O4 <sup>iv</sup> —Eu1—O6                 | 75.8 (4)  | O9—Eu2—O2 <sup>iii</sup>                 | 117.8 (3) |
| O4 <sup>iv</sup> —Eu1—O9 <sup>i</sup>    | 74.6 (3)  | O9—Eu2—O7                                | 93.6 (3)  |
| O4 <sup>iv</sup> —Eu1—O10 <sup>i</sup>   | 93.6 (4)  | O9—Eu2—O8                                | 81.3 (3)  |
| O5—Eu1—O3 <sup>iv</sup>                  | 124.0 (3) | O9—Eu2—O11 <sup>iv</sup>                 | 126.7 (3) |
| O5—Eu1—O9 <sup>i</sup>                   | 139.5 (3) | O9—Eu2—O12 <sup>iv</sup>                 | 74.1 (3)  |
| O5—Eu1—O10 <sup>i</sup>                  | 144.1 (3) | O11 <sup>iv</sup> —Eu2—C1 <sup>iii</sup> | 82.0 (3)  |
| O6—Eu1—O3 <sup>iv</sup>                  | 75.1 (4)  | O11 <sup>iv</sup> —Eu2—C10               | 99.9 (4)  |
| O6—Eu1—O5                                | 53.2 (3)  | O11 <sup>iv</sup> —Eu2—C15 <sup>iv</sup> | 26.5 (3)  |
| O6—Eu1—O9 <sup>i</sup>                   | 147.8 (3) | O11 <sup>iv</sup> —Eu2—O1 <sup>iii</sup> | 95.3 (3)  |
| O6—Eu1—O10 <sup>i</sup>                  | 143.7 (4) | O12 <sup>iv</sup> —Eu2—O1 <sup>iii</sup> | 75.9 (3)  |
| O10 <sup>i</sup> —Eu1—O3 <sup>iv</sup>   | 71.5 (3)  | O12 <sup>iv</sup> —Eu2—O2 <sup>iii</sup> | 95.0 (4)  |
| O10 <sup>i</sup> —Eu1—O9 <sup>i</sup>    | 51.1 (2)  | O12 <sup>iv</sup> —Eu2—O11 <sup>iv</sup> | 52.6 (3)  |
| O2 <sup>iii</sup> —Eu2—O1 <sup>iii</sup> | 50.6 (2)  |                                          |           |

---

Symmetry code(s): (i)  $-x+3/2, -y+1, z+1/2$ ; (ii)  $x-1, y, z$ ; (iii)  $-x+3/2, -y+1, z-1/2$ ; (iv)  $x+1, y, z$ .

**Table S21.** Selected Hydrogen bonding geometries for CP 7.

| D  | H     | A                | d(D-H)/Å | d(H-A)/Å | d(D-A)/Å  | D-H-A/° |
|----|-------|------------------|----------|----------|-----------|---------|
| O1 | WH1WA | O12 <sup>1</sup> | 0.86     | 1.98     | 2.678(12) | 137.1   |
| O1 | WH1WB | O2 <sup>2</sup>  | 0.86     | 2.04     | 2.693(12) | 131.9   |
| O2 | H2WB  | O8 <sup>3</sup>  | 0.89     | 1.77     | 2.619(12) | 159.0   |
| O3 | H3WA  | O10 <sup>4</sup> | 0.85     | 1.87     | 2.678(12) | 157.1   |
| O4 | H4WB  | O5 <sup>3</sup>  | 0.89     | 1.80     | 2.645(12) | 156.2   |

Symmetry code(s): <sup>1</sup>1/2-X,1-Y,1/2+Z; <sup>2</sup>1-X,-1/2+Y,3/2-Z; <sup>3</sup>1/2+X,1/2-Y,1-Z; <sup>4</sup>1-X,-1/2+Y,1/2-Z

**Table S22.** Selected Bond lengths (Å) for CP 8.

|         |            |         |            |
|---------|------------|---------|------------|
| O1—Gd1  | 2.573 (9)  | O7—Gd1  | 2.389 (11) |
| O1—Gd2  | 2.390 (11) | O7—Gd2  | 2.564 (10) |
| O2—Gd1  | 2.502 (10) | O8—Gd2  | 2.481 (13) |
| O1W—Gd1 | 2.392 (11) | O9—Gd1  | 2.426 (14) |
| O3—Gd2  | 2.460 (13) | O10—Gd1 | 2.453 (10) |
| O4—Gd2  | 2.516 (11) | O11—Gd2 | 2.450 (10) |
| O5—Gd1  | 2.430 (13) | O12—Gd2 | 2.465 (11) |
| O4W—Gd2 | 2.393 (12) | Gd1—O2W | 2.371 (12) |
| O6—Gd1  | 2.496 (9)  |         |            |

Symmetry code(s): (i)  $x-1, y, z$ .

**Table S23.** Selected Bond angles (°) for CP 8.

|             |           |             |           |
|-------------|-----------|-------------|-----------|
| O1—Gd2—O4   | 127.3 (4) | O1—Gd2—O3   | 75.3 (4)  |
| O2—Gd1—O1   | 51.2 (3)  | O1—Gd2—O4W  | 150.5 (4) |
| O1W—Gd1—O1  | 73.0 (4)  | O1—Gd2—O7   | 67.3 (3)  |
| O1W—Gd1—O2  | 77.0 (4)  | O1—Gd2—O8   | 118.3 (4) |
| O1W—Gd1—O5  | 144.4 (4) | O1—Gd2—O11  | 92.9 (4)  |
| O1W—Gd1—O6  | 145.9 (4) | O1—Gd2—O12  | 82.3 (4)  |
| O1W—Gd1—O9  | 76.3 (5)  | O3—Gd2—O4   | 52.0 (4)  |
| O1W—Gd1—O10 | 129.6 (4) | O3—Gd2—O7   | 74.4 (4)  |
| O5—Gd1—O1   | 75.1 (4)  | O3—Gd2—O8   | 93.8 (5)  |
| O5—Gd1—O2   | 94.9 (5)  | O3—Gd2—O12  | 122.1 (4) |
| O5—Gd1—O6   | 52.9 (4)  | O4—Gd2—O7   | 96.3 (4)  |
| O5—Gd1—O10  | 76.4 (4)  | O3W—Gd2—C5  | 156.5 (4) |
| O6—Gd1—O1   | 96.2 (3)  | O3W—Gd2—O1  | 79.3 (4)  |
| O6—Gd1—O2   | 71.4 (3)  | O3W—Gd2—O3  | 145.0 (4) |
| O7—Gd1—O1   | 67.2 (3)  | O3W—Gd2—O4  | 146.4 (5) |
| O7—Gd1—O2   | 117.9 (3) | O3W—Gd2—O4W | 80.9 (4)  |
| O7—Gd1—O1W  | 79.1 (4)  | O3W—Gd2—O7  | 73.8 (4)  |
| O7—Gd1—O5   | 74.4 (4)  | O3W—Gd2—O8  | 77.5 (4)  |

|             |           |             |           |
|-------------|-----------|-------------|-----------|
| O7—Gd1—O6   | 127.3 (4) | O3W—Gd2—O11 | 130.4 (4) |
| O7—Gd1—O9   | 82.1 (4)  | O3W—Gd2—O12 | 76.9 (4)  |
| O7—Gd1—O10  | 94.6 (4)  | O4W—Gd2—O3  | 130.9 (4) |
| O9—Gd1—O1   | 139.8 (4) | O4W—Gd2—O4  | 80.0 (5)  |
| O9—Gd1—O2   | 142.4 (5) | O4W—Gd2—O7  | 126.8 (4) |
| O9—Gd1—O5   | 122.1 (4) | O4W—Gd2—O8  | 77.9 (5)  |
| O9—Gd1—O6   | 123.6 (4) | O4W—Gd2—O11 | 83.5 (4)  |
| O9—Gd1—O10  | 53.4 (4)  | O4W—Gd2—O12 | 72.0 (4)  |
| O10—Gd1—O1  | 149.4 (4) | O8—Gd2—O4   | 71.6 (4)  |
| O10—Gd1—O2  | 143.0 (4) | O8—Gd2—O7   | 51.5 (4)  |
| O10—Gd1—O6  | 75.0 (4)  | O11—Gd2—O3  | 75.0 (4)  |
| O2W—Gd1—O1  | 126.2 (4) | O11—Gd2—O4  | 74.2 (4)  |
| O2W—Gd1—O2  | 77.4 (4)  | O11—Gd2—O7  | 146.9 (4) |
| O2W—Gd1—O1W | 81.9 (4)  | O11—Gd2—O8  | 143.3 (4) |
| O2W—Gd1—O5  | 130.7 (4) | O11—Gd2—O12 | 53.5 (4)  |
| O2W—Gd1—O6  | 79.0 (4)  | O12—Gd2—O4  | 122.2 (4) |
| O2W—Gd1—O7  | 151.7 (4) | O12—Gd2—O7  | 140.8 (4) |
| O2W—Gd1—O9  | 73.1 (4)  | O12—Gd2—O8  | 143.0 (5) |
| O2W—Gd1—O10 | 81.6 (5)  |             |           |

---

Symmetry code(s): (i)  $x-1, y, z$ .

**Table S24.** Selected Hydrogen bonding geometries for CP 8.

| <b>D</b> | <b>H</b> | <b>A</b>          | <b>d(D-H)/Å</b> | <b>d(H-A)/Å</b> | <b>d(D-A)/Å</b> | <b>D-H-A/°</b> |
|----------|----------|-------------------|-----------------|-----------------|-----------------|----------------|
| O1W      | H1W      | A O8 <sup>1</sup> | 0.86            | 1.85            | 2.67(2)         | 158.4          |
| O1W      | H1W      | B O3              | 0.86            | 2.07            | 2.688(17)       | 128.4          |
| O2W      | H2W      | A O4 <sup>1</sup> | 0.91            | 2.19            | 2.849(19)       | 128.3          |

Symmetry code(s): <sup>1</sup>1-X,1/2+Y,1/2-Z



**Table S25.** Continuous shape measures analysis of lanthanide coordination spheres in compounds **1-8**. Lowest CShM values are highlighted in orange.

| Entry                  | Continuous shape measure (S) |       |       |       |       |       |        |       |        |       |       |       |       |
|------------------------|------------------------------|-------|-------|-------|-------|-------|--------|-------|--------|-------|-------|-------|-------|
|                        | EP                           | OPY   | HBPY  | JTC   | JCCU  | CCU   | JCSAPR | CSAPR | JTCTPR | TCTPR | JTDIC | HH    | MFF   |
| <b>Ideal polyhedra</b> | 0                            | 0     | 0     | 0     | 0     | 0     | 0      | 0     | 0      | 0     | 0     | 0     | 0     |
| <b>1, Sm</b>           | 32.74                        | 22.41 | 15.99 | 13.30 | 8.243 | 7.486 | 3.279  | 2.745 | 3.943  | 3.537 | 10.53 | 8.604 | 2.642 |
| <b>2, Tb</b>           | 32.56                        | 22.45 | 16.07 | 13.23 | 8.017 | 7.423 | 3.092  | 2.708 | 3.687  | 3.459 | 10.60 | 8.795 | 2.644 |
| <b>3, Eu</b>           | 32.68                        | 22.48 | 16.04 | 13.20 | 8.182 | 7.459 | 3.263  | 2.762 | 3.882  | 3.528 | 10.49 | 8.625 | 2.656 |
| <b>4, Gd</b>           | 32.72                        | 22.53 | 16.01 | 13.16 | 8.13  | 7.435 | 3.211  | 2.737 | 3.805  | 3.451 | 10.47 | 8.720 | 2.638 |
| <b>5, Dy1</b>          | 33.72                        | 23.33 | 17.38 | 15.22 | 9.874 | 8.092 | 3.870  | 3.259 | 4.598  | 3.995 | 12.18 | 6.223 | 2.415 |
| <b>5, Dy2</b>          | 33.57                        | 19.39 | 16.91 | 14.07 | 10.50 | 8.718 | 2.804  | 2.095 | 3.956  | 2.916 | 10.69 | 9.149 | 2.304 |
| <b>6, Pr1</b>          | 33.58                        | 19.40 | 16.96 | 14.04 | 10.52 | 8.744 | 2.805  | 2.091 | 3.949  | 2.906 | 10.63 | 9.186 | 2.320 |
| <b>6, Pr2</b>          | 33.79                        | 23.37 | 17.33 | 15.20 | 9.868 | 8.093 | 3.864  | 3.267 | 4.595  | 3.996 | 12.19 | 6.210 | 2.409 |
| <b>7, Eu1</b>          | 33.66                        | 22.40 | 18.21 | 14.68 | 10.84 | 9.224 | 3.045  | 2.007 | 4.231  | 3.175 | 11.60 | 9.385 | 1.986 |
| <b>7, Eu2</b>          | 33.59                        | 22.68 | 18.00 | 14.69 | 10.67 | 9.011 | 3.073  | 1.957 | 4.387  | 2.946 | 11.02 | 9.263 | 1.919 |
| <b>8, Gd1</b>          | 33.51                        | 22.72 | 18.13 | 14.87 | 10.52 | 8.869 | 3.080  | 1.917 | 4.281  | 2.976 | 11.17 | 9.255 | 1.867 |
| <b>8, Gd2</b>          | 33.69                        | 22.59 | 18.61 | 14.76 | 10.95 | 9.369 | 2.887  | 1.915 | 4.133  | 2.990 | 11.37 | 9.487 | 1.986 |

Abbreviations: **EP**-Enneagon, **OPY**-Octagonal pyramid, **HBPY**-Heptagonal bipyramid, **JTC**-Johnson triangular cupola J3, **JCCU**-Capped cube J8, **CCU**-Spherical-relaxed capped cube, **JCSAPR**-Capped square antiprism J10, **CSAPR**-Spherical capped square antiprism, **JCSAPR**-Capped square antiprism J10, **JTCTPR**-Tricapped trigonal prism J51, **TCTPR**-Spherical tricapped trigonal prism, **JTDIC**- Tridiminished icosahedron J63, **HH**-Hula-hoop, **MFF**-Muffin.
